# Supplementary material for: Transcriptome Analyses Reveal Lipid Metabolic Process in Liver Related to the Difference of Carcass Fat Content in Rainbow Trout (Oncorhynchus mykiss)
Source: Int J Genomics. 2016 Aug 29;2016:7281585. doi: 10.1155/2016/7281585 (PMC5019904; doi:10.1155/2016/7281585)
Supplement: Supplementary file 1 — The detailed information about the 1,694 differentially expressed transcripts identified from liver tissue between the high and low carcass fat content fish were shown in the Supplementary Materials, including standard nomenclature, expression and gene annotation provided by the Trout Genome dataset and the GO enrichment results by using the topGO package. [file 7281585.f1.zip › Figures_and_Supplementary Tables/Supplementary Tables/TableS1.xlsx]

## Sheet: Sheet1
Standard nomenclature	Expression In High Carcass Fat Content Group	Expression In Low Carcass Fat Content Group	Adjuested p vaule	Fold(High/Low)	Gene annotation
GSONMT00043827001	124.664	0.384316	0.0373761	324.379
GSONMT00019433001	48.2828	0.477965	0.00210953	101.017	Uncharacterized_protein
GSONMT00082468001	52.6738	0.686324	0.00210953	76.7477	Phosphoenolpyruvate_carboxykinase_[GTP],
GSONMT00026620001	40.8	0.666803	0.00210953	61.1875	UPI00022AFF5D_related
GSONMT00082014001	40.4616	0.753756	0.00210953	53.68	Cytochrome_P450
GSONMT00051910001	18.9513	0.433273	0.00380702	43.7399	Uncharacterized_protein
GSONMT00023386001	31.2947	0.775505	0.00210953	40.354	Uncharacterized_protein
GSONMT00030540001	38.14	1.03784	0.00210953	36.7494	Trypsin-3
GSONMT00032762001	742.952	20.7943	0.00210953	35.7286	Fatty_acid-binding_protein_10-A,_liver
GSONMT00072976001	6.59249	0.218801	0.00532933	30.1301	Uncharacterized
GSONMT00008758001	8.06688	0.26967	0.00210953	29.9139	Uncharacterized
GSONMT00013259001	19.3896	0.732509	0.00210953	26.4701	Uncharacterized
GSONMT00051756001	9.56672	0.443336	0.0267359	21.5789	Vitelline_membrane_outer_layer_protein_1
GSONMT00038194001	41.3528	2.03353	0.00210953	20.3355	Uncharacterized_protein
GSONMT00072975001	3.17467	0.169215	0.00800839	18.7612	Uncharacterized_protein_(Fragment)
GSONMT00064185001	4.49033	0.24472	0.0227047	18.3488	Uncharacterized
GSONMT00029574001	41.3061	2.33347	0.00210953	17.7016	Cytochrome_P450
GSONMT00077785001	18.7106	1.09194	0.00210953	17.1352	Adiponectin
GSONMT00067478001	151.357	9.03817	0.00210953	16.7464	Uncharacterized
GSONMT00022213001	3.74976	0.231216	0.00672588	16.2176	Uncharacterized
GSONMT00018033001	55.183	3.47702	0.017454	15.8708	Glutathione_peroxidase
GSONMT00082485001	228.295	14.4778	0.00210953	15.7686	1,25-dihydroxyvitamin_D(3)_24-hydroxylase,
GSONMT00040579001	224.719	15.2545	0.00210953	14.7313	Pyruvate_dehydrogenase_kinase
GSONMT00028204001	94.8436	6.46084	0.00210953	14.6798	Dimethylaniline_monooxygenase
GSONMT00055805001	6.85325	0.475935	0.00210953	14.3996	Uncharacterized
GSONMT00072636001	24.1227	1.6925	0.00210953	14.2527	Elongation_factor_1-alpha
GSONMT00050051001	2.97094	0.220894	0.0431353	13.4496	Cathepsin
GSONMT00061495001	1.50344	0.112303	0.0418539	13.3874	Calsequestrin
GSONMT00077043001	6.15022	0.471445	0.0115562	13.0455	Sclerostin_domain-containing_protein
GSONMT00013349001	14.3556	1.17483	0.0378252	12.2193
GSONMT00012937001	4.25834	0.349492	0.0455553	12.1844	Uncharacterized
GSONMT00059523001	9.64132	0.811376	0.00380702	11.8827	Uncharacterized_protein
GSONMT00079635001	20.1519	1.74254	0.00210953	11.5647	Insulin-like_growth_factor_binding
GSONMT00012858001	3.18248	0.280006	0.00210953	11.3658	Serine/threonine-protein_kinase
GSONMT00053836001	13.3336	1.21634	0.00210953	10.9621	Uncharacterized_protein
GSONMT00058072001	30.0884	2.83163	0.00210953	10.6258	Pancreatic_secretory_trypsin
GSONMT00079455001	8.8966	0.854189	0.00210953	10.4153	Uncharacterized_protein
GSONMT00041359001	5.25998	0.513894	0.0455553	10.2355	Uncharacterized
GSONMT00060418001	5.84634	0.577787	0.00210953	10.1185	Protein-glutamine_gamma-glutamyltransferase
GSONMT00004876001	55.4392	5.48429	0.00210953	10.1087	Uncharacterized_protein
GSONMT00077285001	1.15113	0.115672	0.0326894	9.95167	L-lactate_dehydrogenase_B
GSONMT00075887001	1.1017	0.116039	0.00532933	9.49422
GSONMT00072058001	1.56059	0.165379	0.00210953	9.43645	Uncharacterized
GSONMT00006398001	119.013	12.6276	0.00210953	9.42483	Cytochrome_c_oxidase_subunit_4_isoform_2,
GSONMT00045593001	1.66006	0.177544	0.0304813	9.35013	Uncharacterized
GSONMT00040139001	211.255	22.7583	0.00210953	9.28255	Sodium-coupled_neutral_amino_acid_transporter
GSONMT00062425001	2600.5	284.175	0.00380702	9.15105	Uncharacterized
GSONMT00071651001	8.72217	0.954658	0.00210953	9.13643	Uncharacterized
GSONMT00045314001	0.772561	0.0850288	0.0319734	9.08587	Uncharacterized_protein
GSONMT00065215001	413.854	46.1059	0.00210953	8.97616	Retinol-binding_protein
GSONMT00012936001	4.16042	0.467657	0.00210953	8.89631	Uncharacterized
GSONMT00039123001	75.347	8.47096	0.00210953	8.89474	Uncharacterized_protein
GSONMT00052425001	14.9044	1.69574	0.00210953	8.78932	Uncharacterized_protein
GSONMT00076389001	2.25137	0.25634	0.00800839	8.78275	Dystrophin-related_protein
GSONMT00026329001	131.82	15.1482	0.00210953	8.70202	Sodium-coupled_neutral_amino_acid_transporter
GSONMT00011103001	245.484	28.3548	0.00210953	8.65758	UPI00020F71FC_related
GSONMT00047429001	51.9357	6.06695	0.00210953	8.56043	Inhibin_beta_B
GSONMT00036194001	4.05305	0.473868	0.017454	8.55312	L-threonine_3-dehydrogenase,_mitochondrial
GSONMT00064390001	26.2701	3.0917	0.00210953	8.49698	cAMP-responsive_element
GSONMT00047229001	2.7371	0.322834	0.00210953	8.47835	Uncharacterized
GSONMT00017975001	0.730544	0.0867515	0.0488613	8.42111
GSONMT00052159001	208.966	24.9568	0.00210953	8.37311	Cytosolic_10-formyltetrahydrofolate_dehydrogenase
GSONMT00025131001	17.0251	2.03916	0.00210953	8.34908	TC1-like
GSONMT00011101001	2.18512	0.262273	0.00380702	8.33147	Uncharacterized_protein
GSONMT00033993001	155.593	18.9556	0.00210953	8.20829	Cytosolic_10-formyltetrahydrofolate_dehydrogenase
GSONMT00049432001	35.9243	4.43856	0.00210953	8.09368	Uncharacterized
GSONMT00006527001	2.57976	0.31878	0.0104049	8.0926	Uncharacterized_protein
GSONMT00003887001	4.37983	0.550889	0.00210953	7.95048	Proto-oncogene
GSONMT00040863001	15.4322	1.94929	0.00919502	7.91683	Chromosome_7_SCAF14557,_whole_genome_shotgun
GSONMT00014535001	73.1625	9.33079	0.00210953	7.84098	Uncharacterized_protein
GSONMT00032631001	43.5512	5.56802	0.00210953	7.82167	Proto-oncogene
GSONMT00016295001	14.5495	1.8623	0.0282846	7.81265	Chromosome_2_SCAF14997,_whole_genome_shotgun_sequence._(Fragment)
GSONMT00012775001	3.47619	0.446313	0.00210953	7.78868	Glycogen_phosphorylase,_muscle
GSONMT00002348001	3.70989	0.496784	0.0466085	7.46781	Uncharacterized
GSONMT00008810001	258.233	34.5962	0.00210953	7.4642	Hemoglobin_subunit
GSONMT00046096001	5.99661	0.808293	0.00210953	7.41886	Metallophosphoesterase
GSONMT00001788001	104.161	14.0977	0.00210953	7.38851	UPI0002027551_related
GSONMT00018683001	1.57195	0.215995	0.0311542	7.27771	Uncharacterized
GSONMT00040646001	101.246	13.9161	0.00210953	7.27546	Aldehyde_dehydrogenase,
GSONMT00028278001	2.73457	0.377936	0.00210953	7.23554	CDNA,_clone_cssl:d0147
GSONMT00039122001	78.5145	10.9261	0.00210953	7.18596	Proline_dehydrogenase_1,
GSONMT00074814001	11.3252	1.58949	0.00210953	7.12505	Elongation_of_very_long_chain_fatty_acids_protein
GSONMT00009590001	7.36513	1.03646	0.0146934	7.10604	Uncharacterized_protein
GSONMT00017014001	111.89	15.8561	0.00210953	7.05659	Lymphocyte_G0/G1_switch_protein_2
GSONMT00056850001	8.17832	1.1663	0.00210953	7.01219
GSONMT00008193001	2.58472	0.369591	0.00210953	6.99346	Dual_specificity_protein
GSONMT00007574001	2.21402	0.317779	0.00210953	6.96717	Glycogen_phosphorylase,_muscle
GSONMT00079064001	1725.77	248.878	0.00380702	6.9342	Diablo-like
GSONMT00021863001	1.01183	0.14643	0.00380702	6.90999	Class_B_basic_helix-loop-helix_protein
GSONMT00006973001	13.3364	1.93758	0.00210953	6.88302	Metallophosphoesterase
GSONMT00014536001	69.46	10.1715	0.00210953	6.82888	Uncharacterized_protein
GSONMT00037174001	20.7777	3.08442	0.00210953	6.73634	Uncharacterized_protein
GSONMT00009493001	305.76	45.4475	0.00210953	6.72776	Hemoglobin_subunit
GSONMT00009563001	235.339	35.1953	0.00210953	6.68666	Uncharacterized_protein
GSONMT00067638001	4.92846	0.742446	0.00210953	6.63814	Uncharacterized_protein
GSONMT00075776001	26.8466	4.0453	0.00210953	6.63649	Uncharacterized
GSONMT00033789001	6.47183	0.980654	0.00210953	6.5995	Uncharacterized_protein
GSONMT00012775001	5.64194	0.854985	0.0298821	6.59888	Glycogen_phosphorylase,_muscle
GSONMT00016876001	4.41738	0.67432	0.00210953	6.55087	Uncharacterized
GSONMT00006072001	7.37921	1.12698	0.00210953	6.54777	Uncharacterized
GSONMT00060373001	355.169	54.297	0.00210953	6.54123	Chromosome_8_SCAF15044,_whole_genome_shotgun
GSONMT00035829001	10.8234	1.65906	0.00210953	6.52381	Glyceraldehyde-3-phosphate
GSONMT00053157001	4.3764	0.67577	0.00210953	6.47617	Polyadenylate-binding_protein
GSONMT00021628001	1.07774	0.167103	0.0401116	6.44956	Y+L_amino_acid_transporter
GSONMT00039582001	3.34739	0.519961	0.017454	6.43777	Transmembrane_protein
GSONMT00056501001	8.65737	1.35065	0.00210953	6.40978	Phosphoglycerate
GSONMT00009495001	136.352	21.2911	0.00210953	6.40418	Hemoglobin_subunit
GSONMT00072434001	130.978	20.5304	0.00210953	6.37971	Uncharacterized
GSONMT00008811001	219.35	34.5172	0.00210953	6.3548	Beta-globin
GSONMT00054456001	4.93006	0.788299	0.0360674	6.25405	Uncharacterized_protein
GSONMT00067406001	2.81405	0.453	0.00210953	6.21203	Chromosome_12_SCAF15104,_whole_genome_shotgun_sequence._(Fragment)
GSONMT00024492001	2.1849	0.351744	0.0444435	6.21162	H-2_class_II_histocompatibility_antigen,_A-Q_alpha
GSONMT00081823001	1.21154	0.195227	0.01267	6.2058	Uncharacterized_protein
GSONMT00072225001	1237.19	200.572	0.00210953	6.16831	UPF0762_protein_C6orf58
GSONMT00044427001	12.7089	2.06236	0.00210953	6.16231
GSONMT00058133001	557.708	91.287	0.00210953	6.10939	Beta-globin
GSONMT00039142001	6.04025	1.00336	0.00210953	6.02002	Uncharacterized_protein
GSONMT00063127001	2.48716	0.415441	0.0243948	5.98679	Uncharacterized
GSONMT00001868001	1.55565	0.261746	0.0461283	5.94336	Uncharacterized
GSONMT00012629001	701.121	119.81	0.00210953	5.85194	Hemoglobin_subunit
GSONMT00078591001	7.80839	1.35113	0.00210953	5.77916	Fructose-bisphosphate_aldolase_A
GSONMT00007925001	2.62897	0.457816	0.015681	5.74242	UPI00022B239F_related
GSONMT00067502001	26.2024	4.57688	0.00672588	5.72495	cAMP-responsive_element
GSONMT00043637001	35.6415	6.22666	0.0115562	5.72402	Fructose-bisphosphate_aldolase_A
GSONMT00081402001	11.0197	1.92625	0.0304813	5.7208	Uncharacterized
GSONMT00030892001	9.7668	1.72729	0.00210953	5.65441	Uncharacterized
GSONMT00065897001	3.90696	0.691483	0.00210953	5.65012	Uncharacterized_protein_(Fragment)
GSONMT00028083001	1.82879	0.32662	0.0319734	5.59914	Importin_subunit
GSONMT00068118001	4.95401	0.891442	0.00210953	5.5573	Ammonium_transporter_Rh_type
GSONMT00014793001	365.546	66.1647	0.00210953	5.52479	Heme
GSONMT00020149001	3.49987	0.633972	0.00210953	5.52054	Fos-related_antigen
GSONMT00031853001	8.16641	1.4959	0.00210953	5.4592	Chromosome_17_SCAF14563,_whole_genome_shotgun_sequence
GSONMT00079057001	21.3996	3.93436	0.00210953	5.43916	Mitochondrial_uncoupling_protein
GSONMT00018355001	0.688617	0.128607	0.0360674	5.35443	Band_4.1-like_protein
GSONMT00008805001	261.97	49.0012	0.00210953	5.3462	Hemoglobin_subunit
GSONMT00044427001	12.1496	2.28474	0.0304813	5.31772
GSONMT00081730001	2.64214	0.496862	0.00210953	5.31765	Laminin_subunit_beta-3
GSONMT00074576001	4.26318	0.801751	0.00532933	5.31734	Uncharacterized
GSONMT00022755001	1.69102	0.31892	0.0418539	5.30233	Class_B_basic_helix-loop-helix_protein
GSONMT00059206001	25.6352	4.83984	0.00210953	5.2967	UPI00022B1ABC_related
GSONMT00058134001	3463.21	655.602	0.00210953	5.28249	Hemoglobin_subunit
GSONMT00067993001	6.01019	1.13814	0.00210953	5.28071	Zgc:113149-like
GSONMT00032870001	2.6496	0.50358	0.00210953	5.26153	Uncharacterized
GSONMT00053815001	32.702	6.24257	0.00210953	5.23855	Malic_enzyme_(Fragment)
GSONMT00012935001	6.27986	1.20101	0.00210953	5.22882	UPI0001DE7AC4_related
GSONMT00065892001	9.41688	1.80136	0.00210953	5.22765	Troponin_T,_fast_skeletal
GSONMT00008808001	458.771	87.8036	0.00210953	5.22497	Hemoglobin_subunit_beta
GSONMT00025665001	0.964108	0.184761	0.0146934	5.21814	Uncharacterized
GSONMT00062928001	3.07073	0.590785	0.00210953	5.19771	Uncharacterized
GSONMT00047774001	2.24537	0.432143	0.0275077	5.1959	6-phosphofructo-2-kinase/fructose-2,6-bisphosphatase
GSONMT00002221001	4.34306	0.837276	0.0166267	5.18713	Uncharacterized
GSONMT00004514001	1.18203	0.228581	0.0104049	5.17116	Uncharacterized
GSONMT00041783001	5.66422	1.09609	0.00532933	5.16766	Uncharacterized
GSONMT00034115001	0.976937	0.189693	0.0191868	5.1501	Glucose-6-phosphate
GSONMT00005196001	3.73658	0.730378	0.0267359	5.11595	Hepatitis_A_virus_cellular_receptor_1_homolog
GSONMT00008505001	4.37334	0.856383	0.00210953	5.10676	Band_3_anion_exchange
GSONMT00051803001	83.0082	16.2697	0.00210953	5.10201	Sodium-coupled_neutral_amino_acid_transporter
GSONMT00013675001	4.25515	0.836767	0.0405689	5.08523	Uncharacterized_protein
GSONMT00020614001	4.12672	0.81268	0.0373761	5.07792	Toll-like
GSONMT00053535001	11.9835	2.36656	0.00210953	5.06368	Uncharacterized
GSONMT00079339001	1.3867	0.274049	0.00532933	5.06004	Uncharacterized_protein
GSONMT00015259001	42.9664	8.49514	0.00210953	5.05776	Uncharacterized
GSONMT00020216001	69.086	13.7582	0.00210953	5.02144	Uncharacterized
GSONMT00033845001	2.80455	0.560054	0.00800839	5.00764	Uncharacterized
GSONMT00064251001	1.7215	0.344391	0.0483514	4.99868	Apolipoprotein_Eb
GSONMT00022919001	11.9034	2.38644	0.00210953	4.98793	Uncharacterized_protein_(Fragment)_n=2
GSONMT00029272001	15.4832	3.10664	0.00800839	4.98391	NO_Hits
GSONMT00035200001	3.91929	0.791267	0.00210953	4.95318	6-phosphofructo-2-kinase/fructose-2,6-bisphosphatase
GSONMT00018716001	4.413	0.892378	0.00210953	4.94521
GSONMT00029950001	93.8305	19.0926	0.00210953	4.9145	Uncharacterized_protein
GSONMT00063596001	215.902	44.093	0.00210953	4.89651	Aldehyde_dehydrogenase,
GSONMT00062232001	5.06916	1.03559	0.0191868	4.89495	F-box_only_protein
GSONMT00043904001	213.707	43.6734	0.0227047	4.8933	TNF_decoy_receptor
GSONMT00049946001	49.4856	10.1388	0.00210953	4.88081	Uncharacterized
GSONMT00026540001	3.53739	0.725689	0.00919502	4.87453	Uncharacterized
GSONMT00063016001	1.43376	0.295387	0.0267359	4.85384	Chromosome_2_SCAF15004,_whole_genome_shotgun_sequence._(Fragment)
GSONMT00068403001	2.06056	0.425965	0.00210953	4.83739	Chromosome_12_SCAF14652,_whole_genome_shotgun_sequence._(Fragment)
GSONMT00053156001	4.79738	0.996475	0.0104049	4.81435	Polyadenylate-binding_protein
GSONMT00062358001	0.958419	0.199109	0.0260081	4.81354	Uncharacterized_protein
GSONMT00018321001	69.1508	14.3928	0.00210953	4.80454	Uncharacterized_protein
GSONMT00008807001	1266.74	264.564	0.00210953	4.78803	Hemoglobin_subunit
GSONMT00022917001	83.6171	17.4751	0.00210953	4.78493	GTP_cyclohydrolase_1
GSONMT00032292001	4.89829	1.02371	0.00672588	4.78484	Glutaryl-CoA_dehydrogenase,
GSONMT00009334001	1.12812	0.236828	0.0210917	4.76346	UPI00022B220E_related
GSONMT00053816001	15.7642	3.3456	0.00210953	4.71192	Malic
GSONMT00016294001	18.5998	3.94795	0.0191868	4.71126	Uncharacterized_protein
GSONMT00074894001	5.31015	1.13045	0.00210953	4.69738	Probable_E3_ubiquitin-protein_ligase
GSONMT00029937001	6.1657	1.3131	0.00210953	4.69553	Hepatocyte_growth_factor
GSONMT00046561001	36.6434	7.805	0.00210953	4.69486
GSONMT00005189001	31.184	6.67115	0.00210953	4.67446	Early_growth_response_protein
GSONMT00078419001	10.0659	2.15466	0.00210953	4.67169	Zinc_finger_MYND_domain-containing_protein
GSONMT00053081001	5.65356	1.21302	0.015681	4.66073	Ammonium_transporter_Rh_type
GSONMT00060642001	142.249	30.713	0.00210953	4.63156	Aldehyde_dehydrogenase,
GSONMT00030961001	84.9308	18.3401	0.00210953	4.63088	Uncharacterized_protein
GSONMT00010206001	4.07172	0.879332	0.0373761	4.63047	Band_4.1-like_protein
GSONMT00071372001	606.388	131.369	0.00210953	4.61591	Tyrosine_aminotransferase
GSONMT00023347001	1.81014	0.393378	0.00210953	4.60153	Uncharacterized
GSONMT00022604001	354.566	77.2337	0.00210953	4.59082	Uncharacterized
GSONMT00062643001	4.1914	0.913081	0.00210953	4.59039	Uncharacterized
GSONMT00009494001	239.953	52.9612	0.00210953	4.53073	Hemoglobin_subunit_beta
GSONMT00003699001	19.4765	4.30095	0.00380702	4.52842
GSONMT00046199001	5.72089	1.26548	0.017454	4.52073	N-lysine_methyltransferase
GSONMT00074065001	15.9013	3.51753	0.00919502	4.52059	Chromosome_18_SCAF15030,_whole_genome_shotgun_sequence
GSONMT00040319001	72.4066	16.0261	0.00210953	4.51804
GSONMT00073808001	5.14418	1.14904	0.00210953	4.47694	Uncharacterized_protein
GSONMT00046888001	2.00482	0.447862	0.00210953	4.47642
GSONMT00059112001	4.28704	0.95841	0.00210953	4.47308	Uncharacterized_protein
GSONMT00028411001	16.5958	3.73875	0.00210953	4.43886	Fatty_acid-binding_protein,
GSONMT00018321001	64.0647	14.4859	0.00210953	4.42256	Uncharacterized_protein
GSONMT00047435001	0.703866	0.159854	0.0385678	4.40318	Rho_GTPase-activating_protein
GSONMT00012891001	27.2816	6.20025	0.00210953	4.40008	Uncharacterized
GSONMT00023736001	46.719	10.6312	0.00532933	4.39452	Uncharacterized_protein_(Fragment)
GSONMT00022713001	1.59986	0.364891	0.00800839	4.38449	Uncharacterized_protein_(Fragment)
GSONMT00041061001	1.12299	0.256309	0.0498317	4.38139	Novel
GSONMT00072500001	76.7829	17.642	0.00210953	4.35228	Calcium-binding_mitochondrial_carrier_protein
GSONMT00023985001	48.1731	11.0798	0.00210953	4.34783	DPYD
GSONMT00032609001	3.29202	0.757282	0.017454	4.34715	Myosin_heavy_chain,_fast_skeletal
GSONMT00005540001	34.9038	8.05199	0.00210953	4.3348	Dihydropyrimidine_dehydrogenase
GSONMT00008119001	1.12433	0.25954	0.0243948	4.33201	G2/mitotic-specific
GSONMT00050270001	10.3627	2.40245	0.00672588	4.31339	Pyruvate_kinase_isozymes
GSONMT00067189001	47.2209	10.9671	0.00210953	4.30569	Uncharacterized_protein
GSONMT00035215001	2.49025	0.578584	0.017454	4.30404	RING_finger_protein
GSONMT00073156001	3.39602	0.790107	0.0418539	4.29818	Chromosome_15_SCAF14556,_whole_genome_shotgun
GSONMT00051137001	75.6778	17.7376	0.00210953	4.26652	Insulin-like_growth_factor_binding
GSONMT00024594001	8.40259	1.97018	0.00210953	4.26488	Mid1-interacting_protein
GSONMT00008606001	2.89441	0.679439	0.00919502	4.26	Uncharacterized
GSONMT00034943001	3.47418	0.818402	0.0166267	4.24508	Uncharacterized_protein
GSONMT00039591001	66.9593	15.7806	0.00210953	4.24314	Uncharacterized_protein
GSONMT00025920001	9.86253	2.32563	0.00210953	4.2408	Glutamate_[NMDA]_receptor_subunit
GSONMT00021931001	4.0104	0.946246	0.0183534	4.23822	Uncharacterized
GSONMT00028387001	3.45137	0.814598	0.01267	4.2369	Serine/threonine-protein_kinase
GSONMT00076055001	1.97868	0.467013	0.0360674	4.23688	Serine_protease
GSONMT00040695001	3.80555	0.904159	0.0461283	4.20894	UPI0002026BE4_related
GSONMT00037016001	33.8376	8.05398	0.00210953	4.20135
GSONMT00052298001	169.738	40.6486	0.00210953	4.17574	Hemoglobin_subunit_beta
GSONMT00058903001	3.36033	0.805399	0.0392776	4.17225	RILP-like_protein
GSONMT00065275001	3.19306	0.765882	0.00532933	4.16913	Uncharacterized_protein
GSONMT00047082001	1.43967	0.347121	0.00210953	4.14746	Potassium_channel_subfamily_K_member
GSONMT00000751001	11.4904	2.77505	0.00919502	4.14061	Myosin_light_chain
GSONMT00000578001	3.86124	0.938341	0.00210953	4.11496	Transducin-like_enhancer_protein
GSONMT00067167001	3.02984	0.736632	0.00380702	4.1131	Uncharacterized_protein_(Fragment)
GSONMT00049227001	2.55575	0.621817	0.0183534	4.11013	Short_transient_receptor_potential_channel
GSONMT00078481001	1.10446	0.268897	0.0405689	4.10737	Uncharacterized
GSONMT00040244001	72.9268	17.7593	0.00210953	4.1064	Malic
GSONMT00054194001	21.1655	5.15625	0.00380702	4.10482	Lipoprotein
GSONMT00001291001	2.41871	0.590724	0.0251808	4.09448	Uncharacterized_protein
GSONMT00080231001	0.736258	0.180636	0.0298821	4.07592	Uncharacterized_protein
GSONMT00063854001	9.06284	2.22776	0.00210953	4.06814	Early_growth_response_protein
GSONMT00054679001	26.478	6.51396	0.00210953	4.06481	Sodium-coupled_neutral_amino_acid_transporter
GSONMT00047365001	22.7557	5.60479	0.00210953	4.06005	Endothelial
GSONMT00063116001	1.69924	0.419783	0.0431353	4.0479	Uncharacterized_protein
GSONMT00021446001	2.06243	0.509804	0.00210953	4.04554	Uncharacterized_protein
GSONMT00071379001	3.72153	0.921411	0.0466085	4.03895	Uncharacterized_protein_(Fragment)
GSONMT00028395001	17.3628	4.30945	0.00210953	4.02901	Choline
GSONMT00027361001	14.0298	3.48334	0.00210953	4.02769	UPI0001DE6E8C_related
GSONMT00078069001	3.23188	0.802479	0.0492766	4.02737	Uncharacterized
GSONMT00020723001	3.78805	0.941029	0.00210953	4.02543	UPI0002027208_related
GSONMT00067704001	3.74179	0.931416	0.0136609	4.01731	Solute_carrier_family_23_member
GSONMT00023780001	170.012	42.4017	0.00210953	4.00956	Uncharacterized_protein
GSONMT00040588001	1.63496	0.408079	0.0136609	4.00648	Granulocyte_colony-stimulating_factor
GSONMT00012536001	3.71823	0.93013	0.0260081	3.99754	Npy8ar
GSONMT00017842001	7.0278	1.76309	0.00532933	3.98607	Band_3_anion_exchange
GSONMT00064134001	1.40935	0.3552	0.0311542	3.96776	UPI00005463A4_related
GSONMT00013600001	4.05108	1.02338	0.0104049	3.95853	15-hydroxyprostaglandin_dehydrogenase
GSONMT00012700001	2.4185	0.612123	0.0115562	3.951	Myosin_heavy_chain,_fast_skeletal
GSONMT00082810001	0.934994	0.236652	0.0444435	3.95092	Uncharacterized_protein
GSONMT00073159001	16.1521	4.08897	0.00210953	3.95016	Chromosome_6_SCAF14544,_whole_genome_shotgun_sequence._(Fragment)
GSONMT00051554001	5.9829	1.51726	0.00210953	3.94323	Gap_junction_protein
GSONMT00080393001	2.42375	0.615478	0.0345722	3.938	Transcription_factor_IIIB_90_kDa
GSONMT00034444001	13.5896	3.45143	0.00210953	3.93738	Uncharacterized_protein
GSONMT00041164001	1.48911	0.378504	0.0191868	3.9342	CD97_antigen
GSONMT00035498001	66.8629	17.0171	0.00210953	3.92916	UPI0001DE6E8C_related
GSONMT00039341001	19.61	4.99812	0.00210953	3.92348	Uncharacterized_protein_(Fragment)
GSONMT00011949001	11.2261	2.86707	0.00210953	3.91553	Sodium-coupled_neutral_amino_acid_transporter
GSONMT00009383001	471.474	120.712	0.00380702	3.90578	UPI00001A2364_related
GSONMT00033123001	50.7355	13.0106	0.0282846	3.89955	Hedgehog_protein
GSONMT00024533001	7.00576	1.79762	0.0227047	3.89724	Chromosome_undetermined_SCAF14235,_whole_genome_shotgun
GSONMT00042323001	3.93769	1.01124	0.0191868	3.89392	Uncharacterized_protein
GSONMT00076703001	0.82874	0.213405	0.0260081	3.88341	Uncharacterized_protein
GSONMT00069876001	4.76576	1.2358	0.00210953	3.85642	Uncharacterized
GSONMT00015236001	19.8267	5.14826	0.0378252	3.85115	Uncharacterized_protein_(Fragment)_n=2
GSONMT00029486001	10.2534	2.66388	0.00532933	3.84905	Uncharacterized
GSONMT00034460001	2.08323	0.541324	0.017454	3.8484	Uncharacterized_protein
GSONMT00073772001	1.50379	0.391257	0.0166267	3.84348	Solute_carrier_family_52,_riboflavin_transporter,_member_3
GSONMT00034366001	1.5952	0.415365	0.00380702	3.84048	Retinoic_acid_receptor
GSONMT00000578001	4.49202	1.17	0.0136609	3.83933	Transducin-like_enhancer_protein
GSONMT00072626001	24.3548	6.36013	0.00210953	3.82929	Uncharacterized
GSONMT00004352001	1.21842	0.318191	0.00380702	3.82921	Apoptosis-stimulating_of_p53_protein
GSONMT00004350001	0.90611	0.237753	0.0373761	3.81114	Apoptosis-stimulating_of_p53_protein
GSONMT00025519001	11.6736	3.06546	0.00210953	3.80811	Uncharacterized
GSONMT00005306001	8.81152	2.31444	0.00210953	3.80719	Uncharacterized_protein_(Fragment)
GSONMT00032185001	180.912	47.7283	0.00210953	3.79046	UPI000203AEB4_related
GSONMT00030909001	1.36612	0.360937	0.00380702	3.78493	Condensin_complex_subunit
GSONMT00025774001	13.1772	3.48549	0.00210953	3.78059	Glutamate-cysteine_ligase_modifier
GSONMT00051565001	271.868	72.2158	0.00210953	3.76466	Acyl-CoA-binding_protein
GSONMT00016681001	55.8416	14.9234	0.00672588	3.74188	Uncharacterized_protein_(Fragment)
GSONMT00043419001	92.6246	24.7656	0.00210953	3.74005	Xanthine_dehydrogenase/oxidase
GSONMT00036252001	1.5138	0.405312	0.00380702	3.7349	Uncharacterized
GSONMT00000092001	21.0026	5.65314	0.015681	3.71521	Uncharacterized
GSONMT00048168001	18.8192	5.073	0.0183534	3.70968	TC1-like
GSONMT00081064001	7.41419	1.99904	0.00210953	3.70888	Solute_carrier_family_41_member
GSONMT00021172001	2.66083	0.71772	0.00380702	3.70734
GSONMT00020522001	3.50344	0.945298	0.0354097	3.70618	ADP-ribosylation_factor-like_protein
GSONMT00054689001	177.575	48.0234	0.00210953	3.69768
GSONMT00042340001	3.23374	0.878918	0.015681	3.67923	Uncharacterized_protein_(Fragment)
GSONMT00038191001	8.5769	2.33228	0.00210953	3.67747	AN1-type_zinc_finger_protein
GSONMT00046261001	12.2627	3.33789	0.0166267	3.67379	Glutaminase_kidney_isoform,
GSONMT00046630001	3.44684	0.93861	0.00532933	3.67228	Chromosome_9_SCAF14991,_whole_genome_shotgun_sequence.
GSONMT00039268001	5.78555	1.57646	0.00380702	3.66996	Crystallin
GSONMT00018719001	6.06895	1.65498	0.00532933	3.66708
GSONMT00043884001	28.3778	7.7424	0.00210953	3.66525	Uncharacterized
GSONMT00043832001	4.24407	1.15975	0.00380702	3.65947	Uncharacterized
GSONMT00002460001	2.70053	0.738139	0.00210953	3.65857	Uncharacterized
GSONMT00020060001	126.942	34.8366	0.00210953	3.64393	Uncharacterized
GSONMT00008698001	3.70128	1.01809	0.00210953	3.63551	Uncharacterized_protein
GSONMT00038203001	23075.2	6347.28	0.0201417	3.63545
GSONMT00064348001	1.98781	0.546796	0.00919502	3.63538	Uncharacterized
GSONMT00046259001	17.1707	4.73752	0.00210953	3.62441	Glutaminase_kidney_isoform,
GSONMT00042404001	1.07088	0.295513	0.00532933	3.6238	Rho_GTPase-activating_protein
GSONMT00076050001	19.2607	5.33411	0.00210953	3.61086	Uncharacterized_protein_(Fragment)
GSONMT00034199001	3.60264	1.0002	0.00672588	3.60192	C5a_anaphylatoxin_chemotactic
GSONMT00052952001	21.4521	5.96026	0.00210953	3.59919	Uncharacterized_protein
GSONMT00016518001	3.01335	0.837782	0.0227047	3.59682	MARVEL_domain-containing_protein
GSONMT00016749001	1.13473	0.316774	0.0431353	3.58214
GSONMT00038860001	1.9258	0.53832	0.034061	3.57743	Novel_protein_similar_to_activated_leukocyte_cell_adhesion_molecule_(Alcam)_(Fragment)
GSONMT00073071001	57.7083	16.1563	0.015681	3.57188	Chromosome_undetermined_SCAF14025,_whole_genome_shotgun_sequence._(Fragment)
GSONMT00037545001	6.74706	1.89218	0.00210953	3.56576	Uncharacterized_protein_(Fragment)
GSONMT00036654001	2.24349	0.629191	0.0418539	3.56567	Pao_retrotransposon_peptidase_superfamily
GSONMT00072626001	21.2681	5.98151	0.00210953	3.55564	Uncharacterized
GSONMT00009561001	3.71684	1.0471	0.00210953	3.54965	TBC1_domain_family_member
GSONMT00053887001	4.25594	1.1993	0.00210953	3.54869	B-cell_lymphoma_6
GSONMT00032006001	577.205	162.749	0.0311542	3.5466	Glycine
GSONMT00067265001	3.91399	1.10757	0.00532933	3.53385	Serine/threonine-protein_kinase
GSONMT00026025001	21.2611	6.02359	0.00210953	3.52964	Uncharacterized_protein
GSONMT00069934001	5.11568	1.44976	0.0104049	3.52864	Sodium-dependent_neutral_amino_acid_transporter
GSONMT00038205001	9776.84	2771.53	0.0431353	3.5276
GSONMT00055628001	1.13665	0.322306	0.0492766	3.52662	Smoothelin-like_(Fragment)
GSONMT00004338001	3.76704	1.07048	0.0115562	3.51902	Ankrd9
GSONMT00010641001	2.78224	0.791413	0.0166267	3.51553	Uncharacterized
GSONMT00041539001	5.9058	1.68403	0.00210953	3.50694	Uncharacterized_protein_(Fragment)
GSONMT00054169001	5.91317	1.68657	0.00210953	3.50603	Uncharacterized_protein
GSONMT00072931001	14.0445	4.00736	0.00210953	3.50468	UTP--glucose-1-phosphate
GSONMT00044098001	4.54132	1.297	0.00210953	3.5014	Uncharacterized
GSONMT00046637001	13.0259	3.72345	0.017454	3.49834	Integrin
GSONMT00034889001	372.026	106.442	0.0275077	3.49511	Uncharacterized_protein
GSONMT00022771001	17.1295	4.93165	0.0311542	3.47338	Uncharacterized_protein_(Fragment)
GSONMT00059013001	2.60052	0.748953	0.0146934	3.47221	Uncharacterized_protein
GSONMT00032492001	12.8108	3.69258	0.00210953	3.46934	55_kDa_erythrocyte_membrane
GSONMT00050012001	2.36756	0.682652	0.0385678	3.46818	Zgc:158343
GSONMT00026749001	4.89569	1.41231	0.00210953	3.46644	Uncharacterized
GSONMT00050340001	1.00687	0.292178	0.0385678	3.44608	Myosin_heavy_chain,_fast_skeletal
GSONMT00076584001	57.2024	16.6249	0.0235501	3.44077	Ornithine_decarboxylase
GSONMT00069788001	5.25349	1.52911	0.01267	3.43565	Actin,_aortic_smooth
GSONMT00059715001	39.4302	11.4912	0.015681	3.43134	Malic_enzyme
GSONMT00022956001	173.002	50.5602	0.00210953	3.4217
GSONMT00059904001	32.1343	9.41241	0.0367644	3.41404	Monocarboxylate_transporter
GSONMT00004885001	6.42457	1.8847	0.0104049	3.4088	Troponin_I,_slow_skeletal
GSONMT00042377001	2.2565	0.662263	0.0431353	3.40726	Myosin_heavy_chain,_fast_skeletal
GSONMT00014400001	22.3849	6.58724	0.00210953	3.39822	Pleiotropic_regulator
GSONMT00081272001	6.60654	1.94503	0.00210953	3.39663	Arrestin_domain-containing_protein
GSONMT00057053001	13.1719	3.88002	0.00210953	3.3948	Pancreatic_progenitor_cell_differentiation_and_proliferation
GSONMT00074066001	8.90071	2.62687	0.00672588	3.38833	Membrane-spanning_4-domains_subfamily_A_member
GSONMT00015036001	2.94094	0.868328	0.00919502	3.3869	Uncharacterized_protein_(Fragment)
GSONMT00039539001	2.71785	0.805227	0.00210953	3.37526	Slit-like_2
GSONMT00041104001	5.00656	1.48396	0.00210953	3.37378	Uncharacterized_protein_(Fragment)
GSONMT00073542001	2.31136	0.685783	0.0227047	3.3704	Uncharacterized_protein
GSONMT00065358001	13.0375	3.86999	0.00672588	3.36887	Uncharacterized_protein_(Fragment)
GSONMT00009087001	6.26876	1.86185	0.015681	3.36695	Solute_carrier_family_13_(Sodium-dependent_dicarboxylate_transporter),_member
GSONMT00047979001	3.47572	1.03564	0.0166267	3.35611	Uncharacterized_protein
GSONMT00006473001	17.6502	5.26385	0.0260081	3.3531	Uncharacterized
GSONMT00032775001	10.9953	3.27967	0.0191868	3.35256	Tribbles_homolog
GSONMT00024494001	1.42039	0.424131	0.0115562	3.34894	Ubiquitin_carboxyl-terminal_hydrolase
GSONMT00059084001	4.16455	1.24433	0.0136609	3.34682	Uncharacterized_protein
GSONMT00006983001	69.7554	20.8487	0.00210953	3.34579	Cytochrome_P450
GSONMT00017133001	37.2736	11.1423	0.00210953	3.34523	Uncharacterized_protein
GSONMT00075463001	13.1224	3.93193	0.0304813	3.33739	Actin,_aortic_smooth
GSONMT00070529001	4.94817	1.48486	0.00210953	3.33242	Atrial_natriuretic_peptide_receptor
GSONMT00046664001	2.95334	0.886429	0.0104049	3.33173	GTPase_IMAP_family_member
GSONMT00032344001	11.1688	3.35383	0.00672588	3.33016	Uncharacterized
GSONMT00069404001	135.892	40.8081	0.00672588	3.33003	Pyruvate_carboxylase,
GSONMT00069408001	79.9853	24.0518	0.00210953	3.32554	Pyruvate_carboxylase,
GSONMT00057422001	4.94038	1.48797	0.00210953	3.32021	EGF-containing_fibulin-like_extracellular_matrix_protein
GSONMT00073160001	19.3601	5.83145	0.00210953	3.31995	Putative_uncharacterized
GSONMT00047377001	1.38092	0.416717	0.0483514	3.31381	Zgc:113078
GSONMT00034174001	400.521	121.135	0.00210953	3.3064	Cytochrome_P450
GSONMT00013537001	8.57963	2.59919	0.00210953	3.30089	Chromosome_12_SCAF14993,_whole_genome_shotgun_sequence.
GSONMT00043090001	1.36497	0.415023	0.0243948	3.2889	Uncharacterized
GSONMT00006365001	4.00099	1.2166	0.0115562	3.28867	Abhydrolase_domain-containing_protein
GSONMT00017428001	3.71115	1.13014	0.01267	3.2838	SPRY_domain-containing_SOCS_box_protein
GSONMT00064041001	5.93034	1.81362	0.0425255	3.26989	Uncharacterized
GSONMT00004150001	111.743	34.2209	0.00800839	3.26534	Ferritin,_heavy
GSONMT00014447001	370.793	113.673	0.00380702	3.26193	Ferritin,_heavy
GSONMT00062777001	16.5905	5.08665	0.00800839	3.26158	Uncharacterized_protein
GSONMT00082609001	2.47753	0.759896	0.00210953	3.26035	cAMP-specific_3',5'-cyclic_phosphodiesterase
GSONMT00030854001	1.04276	0.320039	0.0136609	3.25823	Kelch-like_protein
GSONMT00079452001	6.97542	2.14612	0.00380702	3.25025	Serine/threonine-protein_kinase
GSONMT00070937001	33.2757	10.2518	0.0304813	3.24584	Serine/threonine-protein_kinase
GSONMT00049734001	5.2012	1.60818	0.01267	3.23422	Ribonuclease
GSONMT00018039001	10.1644	3.14478	0.0373761	3.23215	Uncharacterized
GSONMT00076415001	12.3902	3.83418	0.00210953	3.23151	Early_growth_response_protein
GSONMT00076491001	3.47327	1.07801	0.00672588	3.22193	Monocarboxylate_transporter
GSONMT00063974001	12.5007	3.88115	0.00210953	3.22088	Uncharacterized
GSONMT00012258001	8.46449	2.62962	0.00210953	3.2189	Short-chain_specific_acyl-CoA_dehydrogenase,
GSONMT00002433001	112.731	35.0374	0.00532933	3.21745	Uncharacterized
GSONMT00058804001	11.8531	3.69081	0.0104049	3.21152	Lectin
GSONMT00078057001	38.845	12.1118	0.00210953	3.2072	Uncharacterized
GSONMT00064893001	8.31649	2.59529	0.0146934	3.20445	Uncharacterized
GSONMT00031576001	207.945	64.9879	0.0191868	3.19975	Dimethylglycine_dehydrogenase,
GSONMT00047589001	13.7069	4.28641	0.00210953	3.19776	Proactivator
GSONMT00077352001	5.47683	1.7193	0.00919502	3.1855	Uncharacterized_protein
GSONMT00013236001	7.5386	2.37014	0.00380702	3.18066
GSONMT00082573001	11.4102	3.58913	0.00380702	3.1791	Uridine_kinase
GSONMT00012261001	5.29262	1.66671	0.00210953	3.17549	Jeltraxin
GSONMT00054302001	13.4883	4.25045	0.00210953	3.17338	Uncharacterized
GSONMT00074643001	4.73413	1.49289	0.00532933	3.17112	Uncharacterized
GSONMT00019045001	7.25642	2.28898	0.0115562	3.17015	Lipopolysaccharide-binding_protein/bactericidal_permeability-increasing_protein
GSONMT00016016001	480.408	151.678	0.00210953	3.16729	Uncharacterized
GSONMT00011160001	1.03448	0.326651	0.00800839	3.16693	Uncharacterized
GSONMT00042305001	1.95781	0.620219	0.0466085	3.15664	Uncharacterized_protein_n=2
GSONMT00016916001	319.047	101.262	0.00919502	3.15071	Invariant_chain
GSONMT00047802001	7.76993	2.46968	0.00210953	3.14613	Granulocyte_colony-stimulating_factor
GSONMT00020642001	1.2901	0.410326	0.0373761	3.14409	Reversion-inducing_cysteine-rich_protein_with_Kazal
GSONMT00033484001	0.948842	0.301824	0.0392776	3.14369	Uncharacterized
GSONMT00064010001	17.4841	5.57046	0.00919502	3.13872	Uncharacterized
GSONMT00011389001	130.667	41.6557	0.00210953	3.13683	Uncharacterized_protein
GSONMT00025920001	6.16461	1.97579	0.0136609	3.12007	Glutamate_[NMDA]_receptor_subunit
GSONMT00012279001	10.2015	3.27411	0.0455553	3.11581
GSONMT00012592001	1.44977	0.465803	0.0425255	3.11241	Kelch-like_protein
GSONMT00055215001	247.692	79.7244	0.00919502	3.10685	NADPH--cytochrome_P450
GSONMT00077840001	16.2476	5.23448	0.00210953	3.10396	cAMP-specific_3',5'-cyclic_phosphodiesterase
GSONMT00067434001	19.2963	6.22085	0.00210953	3.10188	Arrestin_domain-containing_protein
GSONMT00047945001	7.31924	2.36105	0.00532933	3.09999	PiggyBac_transposable_element-derived_protein_4_(Fragment)
GSONMT00055469001	14.3577	4.63401	0.00380702	3.09833	Uncharacterized_protein
GSONMT00039491001	12.7448	4.11441	0.00210953	3.0976	Uncharacterized_protein
GSONMT00018032001	25.2549	8.18273	0.00210953	3.08637	Glutathione_peroxidase
GSONMT00008656001	81.7427	26.4979	0.00210953	3.08487	Uncharacterized_protein_(Fragment)
GSONMT00072121001	4.81866	1.56991	0.0405689	3.06939	UDP-N-acetylhexosamine
GSONMT00060869001	6.39215	2.08282	0.00919502	3.06899	Chromosome_undetermined_SCAF9936,_whole_genome_shotgun_sequence.
GSONMT00056231001	72.4288	23.6265	0.00210953	3.06557	Polyprotein_n=1_Tax=Atlantic_salmon_swim
GSONMT00054444001	0.685823	0.223798	0.0492766	3.06447	Uncharacterized
GSONMT00059887001	5.24045	1.71165	0.0378252	3.06164	UPI00020279EC_related
GSONMT00043304001	1.77096	0.579659	0.0483514	3.05518	Uncharacterized_protein
GSONMT00042731001	9.42276	3.08453	0.00532933	3.05484	Deoxyhypusine
GSONMT00072270001	1.95131	0.639875	0.0311542	3.04952	Uncharacterized_protein
GSONMT00033306001	25.0906	8.23341	0.0115562	3.04741	Liver-expressed_antimicrobial_peptide
GSONMT00016404001	2.61171	0.858127	0.0367644	3.0435	L-lactate_dehydrogenase_A
GSONMT00035342001	4.39653	1.44759	0.00380702	3.03714	Uncharacterized
GSONMT00081642001	12.4119	4.08841	0.00380702	3.03587	Uncharacterized_protein
GSONMT00081122001	1.28505	0.423321	0.0146934	3.03564	SWI/SNF_related,_matrix_associated,_actin_dependent_regulator_of_chromatin,_subfamily_a,_member
GSONMT00051158001	7.37925	2.43193	0.00210953	3.03432	Peroxisome_proliferator-activated_receptor
GSONMT00024521001	165.113	54.4201	0.00380702	3.03404	Chromosome_20_SCAF14744,_whole_genome_shotgun_sequence
GSONMT00063477001	69.0464	22.7637	0.00380702	3.03318	Urocanate
GSONMT00055081001	60.0276	19.7911	0.00210953	3.03306	4F2_cell-surface_antigen_heavy_chain
GSONMT00052297001	85.6796	28.3207	0.01267	3.02533	Hemoglobin_subunit
GSONMT00065358001	6.57743	2.17779	0.00210953	3.02023	Uncharacterized_protein_(Fragment)
GSONMT00001426001	10.6773	3.53749	0.0282846	3.01833	Ferritin,_heavy
GSONMT00041539001	7.94742	2.63612	0.00919502	3.01482	Uncharacterized_protein_(Fragment)
GSONMT00075628001	26.9485	8.97155	0.00210953	3.00377
GSONMT00026026001	5.53235	1.84392	0.0104049	3.00032	Tubulin_beta-3
GSONMT00021916001	11.9715	3.99032	0.00210953	3.00014	Uncharacterized
GSONMT00055627001	47.1313	15.7243	0.00210953	2.99735	Uncharacterized
GSONMT00026559001	32.6712	10.9133	0.00919502	2.9937	Serine/threonine-protein_kinase
GSONMT00046884001	221.191	73.9887	0.00210953	2.98952
GSONMT00045585001	192.505	64.4998	0.0136609	2.98458	Uncharacterized_protein
GSONMT00075670001	2.79808	0.937839	0.00380702	2.98354	Lipoprotein
GSONMT00014085001	15.3674	5.15438	0.00532933	2.98143	Chromosome_18_SCAF15038,_whole_genome_shotgun
GSONMT00058499001	14.2834	4.79179	0.00210953	2.98081	Putative_uncharacterized_protein
GSONMT00082261001	2.14054	0.719093	0.0275077	2.97672	Uncharacterized_protein_(Fragment)
GSONMT00065078001	23.7022	7.96466	0.00210953	2.97592	Serine/arginine-rich_splicing_factor
GSONMT00009605001	3.77733	1.27069	0.0104049	2.97266
GSONMT00035582001	24.5615	8.31884	0.00210953	2.95252	Elongation_factor-2_kinase
GSONMT00067809001	3.49982	1.1871	0.00532933	2.94821	Uncharacterized_protein
GSONMT00000462001	25.5205	8.67458	0.00210953	2.94199
GSONMT00058003001	8.99868	3.05952	0.0385678	2.94121	Uncharacterized_protein
GSONMT00062729001	160.673	54.8105	0.0183534	2.93143	Transposable_element_Tcb2_transposase
GSONMT00059711001	14.1024	4.81223	0.00210953	2.93053	Uncharacterized_protein
GSONMT00076633001	6.24502	2.13441	0.0227047	2.92588	LBH
GSONMT00066615001	10.4256	3.56465	0.00210953	2.92472	Long-chain-fatty-acid--CoA_ligase
GSONMT00058341001	5.80509	1.98978	0.0183534	2.91745	Uncharacterized
GSONMT00023306001	12.0603	4.13806	0.0267359	2.91448
GSONMT00038072001	6.32633	2.17439	0.00532933	2.90947	5-aminolevulinate_synthase,_erythroid-specific,
GSONMT00009561001	5.82424	2.00226	0.00210953	2.90883	TBC1_domain_family_member
GSONMT00022672001	1.1903	0.40967	0.0378252	2.90551	Uncharacterized
GSONMT00047978001	4.55108	1.56658	0.00210953	2.90511	Uncharacterized_protein
GSONMT00055312001	45.9275	15.82	0.0405689	2.90313	Retinoid-binding_protein
GSONMT00060869001	9.86172	3.40069	0.0401116	2.89992	Chromosome_undetermined_SCAF9936,_whole_genome_shotgun_sequence.
GSONMT00054932001	52.1979	18.0027	0.00210953	2.89945	MHC_class_II_antigen_beta_chain
GSONMT00063596001	124.514	43.042	0.00672588	2.89285	Aldehyde_dehydrogenase,
GSONMT00068112001	1.808	0.625602	0.0354097	2.89002	Uncharacterized
GSONMT00063154001	16.0593	5.55877	0.0282846	2.889	Uncharacterized_protein
GSONMT00066480001	17.1917	5.96095	0.00210953	2.88405	Acyl-CoA_dehydrogenase_family_member_11
GSONMT00068101001	123.794	42.9826	0.00210953	2.8801	Apolipoprotein_B_(Fragment)
GSONMT00018962001	5.52303	1.91878	0.00210953	2.87841	Uncharacterized
GSONMT00013540001	7.29466	2.53636	0.00210953	2.87603	Electrogenic_sodium_bicarbonate_cotransporter
GSONMT00081403001	12.2586	4.27652	0.00532933	2.86649	Uncharacterized
GSONMT00057535001	7.34269	2.56587	0.00210953	2.86168	Chromosome_9_SCAF14729,_whole_genome_shotgun
GSONMT00070951001	12.6412	4.42227	0.00210953	2.85853	Uncharacterized
GSONMT00074060001	24.2249	8.48807	0.034061	2.85399	N-acylneuraminate
GSONMT00040936001	48.4268	16.9813	0.00672588	2.85177	Tryptophan
GSONMT00052668001	95.1305	33.4091	0.00380702	2.84744	Dicarbonyl/L-xylulose
GSONMT00003405001	14.8492	5.21766	0.00380702	2.84595	UPI00022B13F0_related
GSONMT00050187001	48.3976	17.0182	0.0115562	2.84387	UPI0001DE705C_related
GSONMT00032965001	4.41457	1.55281	0.0166267	2.84296	Uncharacterized_protein
GSONMT00033356001	10.4652	3.68219	0.00210953	2.84211	Uncharacterized_protein_(Fragment)
GSONMT00075025001	32.7127	11.5191	0.00210953	2.83987	Uncharacterized
GSONMT00014544001	30.5045	10.744	0.00210953	2.83921	Uncharacterized
GSONMT00014424001	11.5397	4.06702	0.00210953	2.83738	Uncharacterized
GSONMT00028041001	5.74646	2.02561	0.00919502	2.8369	Uncharacterized_protein
GSONMT00000019001	33.6527	11.8792	0.00210953	2.83291	Uncharacterized
GSONMT00023357001	95.8663	33.916	0.00210953	2.82658	Invariant_chain-like_protein
GSONMT00012546001	4.32896	1.53171	0.00210953	2.82623	Uncharacterized
GSONMT00068446001	9.83094	3.48025	0.00210953	2.82478	Argininosuccinate
GSONMT00041949001	11.7552	4.1629	0.00532933	2.8238	Endonuclease_domain-containing_1_protein
GSONMT00020700001	5.41357	1.91796	0.00380702	2.82257	Uncharacterized
GSONMT00014971001	1.73405	0.615241	0.0378252	2.81849	Uncharacterized_protein_(Fragment)
GSONMT00058805001	12.5938	4.47779	0.00532933	2.8125	Lectin
GSONMT00000191001	85.151	30.2985	0.00800839	2.8104	Uncharacterized_protein_(Fragment)
GSONMT00051481001	105.072	37.4107	0.0115562	2.80861	Uncharacterized
GSONMT00029545001	35.8591	12.7894	0.00210953	2.80381
GSONMT00045883001	49.0637	17.5199	0.0104049	2.80046	Novel_protein
GSONMT00007586001	35.5365	12.6958	0.01267	2.79908	Bile_acid_receptor
GSONMT00075511001	12.2694	4.38481	0.00380702	2.79816	Cholinergic_receptor,_muscarinic
GSONMT00036200001	273.235	97.8875	0.0304813	2.79132	Uncharacterized_protein
GSONMT00075403001	4.86331	1.74309	0.0290463	2.79005	Uncharacterized_protein_(Fragment)
GSONMT00003406001	21.9462	7.88724	0.00380702	2.78249	UPI00022B13F0_related
GSONMT00010119001	22.673	8.14979	0.00210953	2.78203	Monoacylglycerol_lipase
GSONMT00079604001	4.04189	1.45522	0.0219475	2.77751	Uncharacterized
GSONMT00000244001	74.9172	26.985	0.00210953	2.77625	Sodium/potassium-transporting_ATPase_subunit
GSONMT00034445001	10.81	3.89513	0.00380702	2.77526	Chromosome_10_SCAF15019,_whole_genome_shotgun
GSONMT00037024001	7.18263	2.59083	0.00380702	2.77233	72_kDa_type_IV
GSONMT00007687001	3.50001	1.26377	0.0311542	2.7695	UPI00022B39E9_related
GSONMT00061752001	2.55678	0.923543	0.0267359	2.76845	C-C_chemokine_receptor_type
GSONMT00017439001	72.4084	26.1594	0.00210953	2.76797	Invariant_chain
GSONMT00053835001	3.12743	1.13044	0.0483514	2.76656	UPI0001DE87D5_related
GSONMT00052124001	3.17651	1.14922	0.0267359	2.76406	Phytanoyl-CoA_hydroxylase-interacting
GSONMT00064682001	127.707	46.2109	0.00532933	2.76357	Insulin-like_growth_factor-binding_protein_complex_acid_labile
GSONMT00031796001	2.24951	0.814752	0.017454	2.76098	Uncharacterized
GSONMT00066877001	171.115	62.0403	0.00672588	2.75813	Uncharacterized_protein_(Fragment)
GSONMT00070972001	7.61601	2.76233	0.0115562	2.7571	Integrin
GSONMT00044823001	3.3661	1.22291	0.0378252	2.75253	Protein_sprouty_homolog
GSONMT00029009001	52.2631	19.0665	0.00210953	2.7411	Succinyl-CoA_ligase_[GDP-forming]_subunit_beta,
GSONMT00039219001	26.534	9.69106	0.0392776	2.73799	P-glycoprotein_(Fragment)
GSONMT00057776001	13.2997	4.85964	0.00919502	2.73677	Uncharacterized
GSONMT00054786001	3.51849	1.28565	0.0492766	2.73674	Guanylate_cyclase_(Fragment)
GSONMT00057773001	4.12398	1.50965	0.0201417	2.73175	Alpha-N-acetylgalactosaminide_alpha-2,6-sialyltransferase
GSONMT00046608001	12.0963	4.42814	0.0431353	2.73169	MAP_kinase-interacting_serine/threonine-protein_kinase
GSONMT00054661001	13.5274	4.95447	0.0461283	2.73034	Uncharacterized_protein
GSONMT00017434001	9.85874	3.61463	0.00380702	2.72745	Macrophage_colony-stimulating_factor_1
GSONMT00066333001	190.247	69.8885	0.0466085	2.72215	Uncharacterized_protein
GSONMT00044632001	1.64907	0.606222	0.044947	2.72024	Perforin-1
GSONMT00068781001	13.5326	4.9833	0.034061	2.71559	Uncharacterized_protein
GSONMT00074967001	2.42064	0.893211	0.0166267	2.71004	Uncharacterized_protein
GSONMT00063101001	6.07084	2.2422	0.0136609	2.70754	Uncharacterized
GSONMT00028041001	4.52437	1.67184	0.0354097	2.70622	Uncharacterized_protein
GSONMT00004079001	13.0968	4.84542	0.00532933	2.70292	Uncharacterized_protein_(Fragment)
GSONMT00053725001	2.74935	1.01809	0.0488613	2.7005	Uncharacterized
GSONMT00080021001	11.8434	4.38571	0.0136609	2.70045	Uncharacterized_protein
GSONMT00058697001	11.3383	4.20244	0.0115562	2.69803	Solute_carrier_family_13_(Sodium-dependent_dicarboxylate_transporter),_member
GSONMT00003566001	36.6825	13.6105	0.00532933	2.69516	DEP_domain-containing_mTOR-interacting
GSONMT00026574001	5.95959	2.21122	0.0267359	2.69516	Lipopolysaccharide-binding_protein/bactericidal_permeability-increasing_protein
GSONMT00055402001	10.9282	4.05569	0.00800839	2.69454	Uncharacterized_protein
GSONMT00062622001	2.05151	0.762216	0.0146934	2.69151	Uncharacterized
GSONMT00064348001	3.01852	1.12293	0.034061	2.68807	Uncharacterized
GSONMT00058500001	10.3475	3.85271	0.00672588	2.68577	Uncharacterized
GSONMT00008183001	32.5938	12.144	0.00672588	2.68394	Uncharacterized_protein
GSONMT00070526001	5.14936	1.9189	0.0251808	2.6835	Atrial_natriuretic_peptide_receptor
GSONMT00010163001	233.747	87.1299	0.0360674	2.68274	Uncharacterized_protein_(Fragment)
GSONMT00033824001	24.5709	9.20096	0.00532933	2.67047	Major_vault_protein
GSONMT00048073001	4.46317	1.67196	0.0378252	2.66942	Uncharacterized_protein
GSONMT00032974001	2.53017	0.948538	0.0492766	2.66744	Guanylate
GSONMT00001213001	10.4765	3.92937	0.00210953	2.6662	Leucine-rich_repeat-containing_protein
GSONMT00044023001	3.20863	1.2058	0.015681	2.661	Transforming_growth_factor-beta-inducible_early_growth_response_protein
GSONMT00060652001	14.0958	5.30186	0.00800839	2.65865	Peroxisome_proliferator_activated_receptor_beta
GSONMT00040824001	212.339	79.9576	0.00800839	2.65564	Uncharacterized
GSONMT00076542001	6.31834	2.38305	0.0243948	2.65137	Kinesin_light_chain
GSONMT00073741001	8.07512	3.04622	0.0115562	2.65087	Chromosome_9_SCAF14729,_whole_genome_shotgun
GSONMT00010151001	4.56365	1.72236	0.0235501	2.64965
GSONMT00004624001	181.106	68.4576	0.0136609	2.64552	Sarcosine_dehydrogenase
GSONMT00069825001	24.3525	9.20554	0.00210953	2.64542	Chromosome_undetermined_SCAF14676,_whole_genome_shotgun_sequence
GSONMT00048512001	93.8107	35.484	0.0191868	2.64375	Uncharacterized_protein
GSONMT00014810001	174.929	66.2056	0.0183534	2.64221	Glutaryl-CoA_dehydrogenase,
GSONMT00066950001	5.29928	2.00954	0.00800839	2.63706	Probable_carboxypeptidase
GSONMT00011147001	14.9718	5.68795	0.0104049	2.6322	Aldehyde_dehydrogenase,
GSONMT00061443001	1.23397	0.469236	0.0115562	2.62974	MGC80781
GSONMT00075629001	5.67381	2.16064	0.00532933	2.62599	Adenylate_kinase_isoenzyme
GSONMT00046204001	290.964	110.859	0.0354097	2.62463	Uncharacterized_protein
GSONMT00074204001	10.2008	3.89156	0.00210953	2.62126	Novel_protein
GSONMT00015621001	1.2223	0.466861	0.0405689	2.61812	Uncharacterized
GSONMT00037022001	2.71387	1.03674	0.0345722	2.6177	72_kDa_type_IV
GSONMT00065207001	3.11291	1.19002	0.00380702	2.61585	'1-phosphatidylinositol-4,5-bisphosphate_phosphodiesterase
GSONMT00042226001	7.67946	2.93904	0.0492766	2.61291	Uncharacterized_protein
GSONMT00068647001	3.85645	1.47753	0.0210917	2.61007	Transient_receptor_potential_cation_channel_subfamily_V_member
GSONMT00038526001	6.88924	2.64036	0.0183534	2.6092	Uncharacterized
GSONMT00048479001	23.7837	9.12221	0.01267	2.60723	Chromosome_19_SCAF14664,_whole_genome_shotgun_sequence._(Fragment)
GSONMT00004372001	2.49463	0.956846	0.0166267	2.60714	Transcriptional_activator_protein
GSONMT00044101001	173.296	66.5487	0.0479219	2.60405	Alanine_aminotransferase
GSONMT00080044001	33.8229	13.0007	0.0115562	2.60162	Uncharacterized_protein_(Fragment)
GSONMT00036687001	278.04	106.897	0.0235501	2.60101	Glyceraldehyde-3-phosphate
GSONMT00064505001	4.45523	1.71325	0.00800839	2.60046	Uncharacterized
GSONMT00005182001	19.6184	7.5489	0.00919502	2.59884	C-terminal-binding_protein
GSONMT00043215001	12.9651	4.9934	0.0455553	2.59645	PREDICTED:_LOW_QUALITY_PROTEIN:_sodium-_and_chloride-dependent_taurine_transporter
GSONMT00068100001	269.26	103.851	0.034061	2.59275	Uncharacterized_protein
GSONMT00049441001	17.3073	6.68115	0.0183534	2.59047
GSONMT00049907001	19.0775	7.37265	0.00532933	2.5876	Chromosome_2_SCAF14781,_whole_genome_shotgun_sequence._(Fragment)
GSONMT00044867001	19.6825	7.61266	0.00672588	2.5855	Uncharacterized
GSONMT00063783001	29.7614	11.516	0.00919502	2.58435	3_beta-hydroxysteroid_dehydrogenase_type
GSONMT00049440001	10.2294	3.95887	0.00919502	2.58392	NO_Hits
GSONMT00021222001	55.6077	21.5319	0.00380702	2.58257	Polyadenylate-binding_protein-interacting_protein
GSONMT00080071001	6.43513	2.49534	0.00380702	2.57886	Putative_uncharacterized_protein
GSONMT00060869001	10.8105	4.20287	0.0345722	2.57217	Chromosome_undetermined_SCAF9936,_whole_genome_shotgun_sequence.
GSONMT00008622001	9.3206	3.62417	0.00672588	2.57179	Novel_protein
GSONMT00053098001	10.0846	3.9243	0.00532933	2.56978	Uncharacterized
GSONMT00047027001	273.904	106.588	0.0191868	2.56975	Urocanate_hydratase
GSONMT00014314001	215.812	84.0097	0.0260081	2.56889	Ferritin,_heavy
GSONMT00051436001	13.5462	5.282	0.0146934	2.5646	Lethal(2)_giant_larvae_protein_homolog
GSONMT00076635001	1.55628	0.607013	0.0345722	2.56383	Tumor_necrosis_factor,_alpha-induced_protein_2
GSONMT00004097001	9.71573	3.7899	0.0191868	2.56358	Novel_protein_similar_to_mouse_microtubule-associated_protein_7_(Mtap7)
GSONMT00015328001	2.56662	1.00137	0.044947	2.56311	Uncharacterized_protein
GSONMT00021854001	14.0116	5.47666	0.0304813	2.55842
GSONMT00018126001	3.55746	1.39469	0.0191868	2.55072
GSONMT00027544001	11.508	4.51821	0.0304813	2.54703	Aryl_hydrocarbon_receptor_1
GSONMT00007686001	3.23775	1.27134	0.0136609	2.54672	Uncharacterized
GSONMT00030719001	108.596	42.715	0.00672588	2.54234	Keratin,_type_I_cytoskeletal
GSONMT00076462001	8.72488	3.43194	0.0418539	2.54226	Uncharacterized_protein
GSONMT00023797001	35.3896	13.9319	0.0201417	2.54018	UPI0001DE705C_related
GSONMT00015202001	6.02104	2.37265	0.0275077	2.53769	Phosphatidylinositol_4-kinase
GSONMT00064460001	1.80713	0.712863	0.0418539	2.53503	Uncharacterized
GSONMT00001597001	25.6224	10.1094	0.00800839	2.53451	2-acylglycerol_O-acyltransferase
GSONMT00081975001	101.908	40.2214	0.0345722	2.53368	Succinyl-CoA_ligase_[GDP-forming]_subunit_beta,
GSONMT00062942001	9.33502	3.6847	0.0275077	2.53345	Uncharacterized
GSONMT00000254001	10.1626	4.01404	0.0498317	2.53176	Uncharacterized_protein
GSONMT00069676001	4.85329	1.91726	0.0326894	2.53137	Activin_receptor
GSONMT00034361001	16.1241	6.37521	0.0498317	2.52919	Uncharacterized_protein
GSONMT00002556001	9.47758	3.74865	0.0483514	2.52826	Chromosome_18_SCAF14786,_whole_genome_shotgun
GSONMT00055378001	2.58754	1.02567	0.0492766	2.52278
GSONMT00079608001	4.91229	1.94741	0.0260081	2.52247	Uncharacterized_protein
GSONMT00070189001	7.64415	3.03235	0.00532933	2.52087	Annexin
GSONMT00025818001	15.0152	5.9567	0.0227047	2.52072	Sodium/potassium-transporting_ATPase_subunit
GSONMT00000496001	6.12201	2.42913	0.0492766	2.52025	Uncharacterized_protein_(Fragment)
GSONMT00050393001	1.23363	0.489566	0.0304813	2.51984	Uncharacterized
GSONMT00037629001	13.1625	5.22406	0.00532933	2.51959	Uncharacterized
GSONMT00005813001	11.4857	4.56492	0.0251808	2.51608	WD_repeat-containing_protein
GSONMT00074199001	1.95618	0.777565	0.044947	2.51578	Leupaxin
GSONMT00070822001	14.4153	5.73723	0.0227047	2.51259	Uncharacterized_protein
GSONMT00043499001	1.31923	0.525616	0.044947	2.50987	Uncharacterized_protein_(Fragment)
GSONMT00070821001	14.9677	5.97515	0.017454	2.50499	Uncharacterized
GSONMT00031868001	233.188	93.1607	0.00672588	2.50307	Sarcosine_dehydrogenase,
GSONMT00029660001	224.581	89.7387	0.0483514	2.50261	Kinesin-like_protein_KIF3A
GSONMT00077699001	19.3594	7.7428	0.017454	2.50031	UPI00022B0E8F_related
GSONMT00000244001	62.4862	25.0197	0.0136609	2.49748	Sodium/potassium-transporting_ATPase_subunit
GSONMT00048538001	66.0252	26.4437	0.0275077	2.49682	Uncharacterized_protein
GSONMT00079695001	2.30553	0.923904	0.0488613	2.49542	NADPH_oxidase_cytosolic
GSONMT00003793001	58.9603	23.6362	0.0146934	2.49449	Uncharacterized
GSONMT00073683001	3.7232	1.49271	0.0275077	2.49426	Carbonic_anhydrase
GSONMT00033312001	371.043	148.83	0.0166267	2.49307	Superoxide_dismutase
GSONMT00047982001	202.793	81.4107	0.0334882	2.49099	Serine_hydroxymethyltransferase,
GSONMT00076607001	4.35759	1.75652	0.0235501	2.48081	Methionine_aminopeptidase
GSONMT00027109001	309.886	124.939	0.00532933	2.4803	Uncharacterized
GSONMT00062209001	7.47375	3.01359	0.0146934	2.48002	Chromosome_2_SCAF14781,_whole_genome_shotgun_sequence._(Fragment)
GSONMT00050774001	16.0118	6.46122	0.0210917	2.47814	Dual_specificity_protein_phosphatase
GSONMT00048513001	41.0656	16.5732	0.0146934	2.47783	Uncharacterized_protein
GSONMT00052587001	164.377	66.4412	0.0311542	2.47402	Probable_ATP-dependent_RNA_helicase
GSONMT00072048001	3.35377	1.35596	0.0251808	2.47335	Uncharacterized
GSONMT00060334001	6.17312	2.4995	0.0431353	2.46974	Serine_palmitoyltransferase
GSONMT00048920001	15.1448	6.13953	0.0191868	2.46677	Gamma-interferon-inducible_lysosomal_thiol
GSONMT00045377001	10.892	4.41723	0.00919502	2.4658	Uncharacterized_protein
GSONMT00009380001	17.4119	7.0623	0.00210953	2.46547	GDNF_family_receptor_alpha
GSONMT00057105001	4.08946	1.65957	0.044947	2.46417	Uncharacterized
GSONMT00047532001	53.8905	21.9483	0.0282846	2.45534	Envelope
GSONMT00007250001	53.2945	21.7189	0.00672588	2.45383	Uncharacterized_protein_(Fragment)
GSONMT00022118001	12.958	5.29027	0.0298821	2.4494	Uncharacterized
GSONMT00057439001	5.6461	2.31156	0.0488613	2.44255	Uncharacterized_protein
GSONMT00025618001	6.12826	2.5101	0.034061	2.44144	Transmembrane_protein
GSONMT00059811001	20.7724	8.5118	0.00800839	2.44042	Uncharacterized
GSONMT00014674001	130.726	53.5787	0.0326894	2.43989	Uncharacterized
GSONMT00052978001	12.0956	4.96717	0.0146934	2.43511	Uncharacterized_protein
GSONMT00068518001	5.7509	2.36172	0.0282846	2.43505	P3
GSONMT00006900001	58.7227	24.1796	0.0146934	2.42861	OCIA_domain-containing_protein_2
GSONMT00038850001	8.62698	3.55415	0.0183534	2.4273	Uncharacterized
GSONMT00004880001	32.6765	13.4653	0.0219475	2.42672	Uncharacterized_protein_(Fragment)
GSONMT00019843001	2.7057	1.11499	0.0219475	2.42666	Serine/threonine-protein_kinase
GSONMT00056525001	6.40517	2.64164	0.0136609	2.42469
GSONMT00059908001	14.6762	6.05445	0.0183534	2.42404	Uncharacterized
GSONMT00011779001	18.4806	7.62572	0.0243948	2.42346	Somatostatin_receptor_type
GSONMT00031193001	39.8102	16.4282	0.0166267	2.42328	UPI0001DE71E5_related
GSONMT00067832001	2.3265	0.961391	0.0455553	2.41993	Cmklr1
GSONMT00033276001	6.58397	2.7213	0.0444435	2.41942	Growth_arrest_and_DNA_damage-inducible_protein_GADD45
GSONMT00053107001	46.5178	19.2315	0.00919502	2.41883	Cytochrome_P450
GSONMT00019804001	11.145	4.6093	0.0136609	2.41794	Chromosome_undetermined_SCAF14676,_whole_genome_shotgun_sequence
GSONMT00014867001	34.9971	14.4817	0.00800839	2.41664	UPF0515_protein_C19orf66_homolog
GSONMT00036201001	671.616	278.033	0.0227047	2.4156	Nuclease-sensitive_element-binding_protein_1
GSONMT00022276001	162.348	67.3618	0.0243948	2.41009	Uncharacterized
GSONMT00030752001	12.3851	5.14113	0.0367644	2.40902	Uncharacterized
GSONMT00009330001	11.9558	4.96599	0.0472534	2.40754	Uncharacterized
GSONMT00065748001	3.58367	1.48983	0.0146934	2.40542	Uncharacterized_protein
GSONMT00037416001	37.5809	15.6602	0.00800839	2.39977	Complement_C1q_subcomponent_subunit_B
GSONMT00023922001	7.78061	3.24404	0.034061	2.39843	Uncharacterized
GSONMT00044350001	31.9695	13.3328	0.0146934	2.39781	Uncharacterized_protein_(Fragment)
GSONMT00028682001	15.0573	6.28039	0.0166267	2.39751	Uncharacterized
GSONMT00033700001	6.48892	2.70883	0.00800839	2.39547	Transcription_factor
GSONMT00076131001	6.5653	2.74604	0.015681	2.39082	Uncharacterized
GSONMT00065505001	2.74725	1.14991	0.0431353	2.3891	Uncharacterized_protein
GSONMT00049395001	11.9007	4.98562	0.0191868	2.38701	Lipopolysaccharide-binding_protein/bactericidal_permeability-increasing_protein
GSONMT00071883001	33.6094	14.0823	0.034061	2.38664	Glycine_cleavage_system_H_protein,
GSONMT00014863001	2.62721	1.10097	0.0334882	2.38627	Uncharacterized
GSONMT00071381001	2.73168	1.14508	0.0466085	2.38558	Uncharacterized_protein
GSONMT00023465001	15.1328	6.34414	0.0418539	2.38532	Cysteine-rich_protein
GSONMT00028683001	16.4152	6.88429	0.034061	2.38444	Uncharacterized
GSONMT00043744001	12.403	5.21257	0.0319734	2.37944	Uncharacterized
GSONMT00077647001	8.98138	3.77599	0.0243948	2.37855	Serine/threonine-protein_kinase
GSONMT00076545001	52.9381	22.2588	0.0104049	2.3783	Uncharacterized
GSONMT00050687001	3.20291	1.3477	0.0334882	2.37657	Uncharacterized
GSONMT00036133001	22.6379	9.52793	0.0498317	2.37595	S100-like_calcium_binding
GSONMT00057341001	12.9055	5.44905	0.0251808	2.36839	Uncharacterized
GSONMT00064683001	8.38187	3.54237	0.0201417	2.36618	Uncharacterized_protein
GSONMT00016238001	5.41654	2.29016	0.017454	2.36514	Uncharacterized_protein
GSONMT00014164001	4.67181	1.97736	0.0483514	2.36265	Protein
GSONMT00058002001	8.58927	3.63871	0.0304813	2.36053
GSONMT00021506001	8.35155	3.54272	0.0267359	2.35738	Uncharacterized
GSONMT00046736001	275.303	116.808	0.044947	2.35688
GSONMT00037923001	29.4937	12.5235	0.0201417	2.35507	Neuroepithelial_cell-transforming_gene_1
GSONMT00078899001	3.24263	1.37711	0.0360674	2.35466	Uncharacterized
GSONMT00005466001	10.8148	4.59582	0.0267359	2.35318	Mitochondrial_glutamate_carrier
GSONMT00075098001	4.11354	1.75017	0.0488613	2.35037	Uncharacterized
GSONMT00077242001	157.659	67.0803	0.0146934	2.3503	Cytochrome_c_oxidase_polypeptide_VIII-heart,
GSONMT00056382001	10.5265	4.48102	0.0311542	2.34913	Uncharacterized
GSONMT00011596001	4.20313	1.78933	0.0405689	2.349	Chromosome_undetermined_SCAF11369,_whole_genome_shotgun
GSONMT00044099001	3.84254	1.63595	0.034061	2.34881	Uncharacterized
GSONMT00009008001	8.92987	3.80321	0.0282846	2.34798	Uncharacterized
GSONMT00057238001	3.31114	1.41039	0.0290463	2.34768	Uncharacterized_protein
GSONMT00016793001	16.1411	6.87671	0.0326894	2.34721	NF-kappa-B_inhibitor
GSONMT00062568001	5.15815	2.19765	0.0183534	2.34712	Uncharacterized_protein
GSONMT00070684001	27.6207	11.8007	0.0115562	2.3406	Glutathione
GSONMT00052814001	67.0009	28.6271	0.0235501	2.34047	Uncharacterized_protein
GSONMT00003858001	4.28012	1.82937	0.0191868	2.33967	Uncharacterized
GSONMT00069671001	3.46367	1.48098	0.0235501	2.33877	Uncharacterized
GSONMT00027931001	14.0594	6.01182	0.0191868	2.33863	Uncharacterized_protein_(Fragment)
GSONMT00029755001	12.7316	5.44729	0.0311542	2.33724	UPI0000F205F5_related
GSONMT00054306001	20.7514	8.88844	0.017454	2.33465	Phosphoglycerate_mutase_(Fragment)
GSONMT00060217001	179.991	77.1695	0.0210917	2.33241	Chromosome_undetermined_SCAF11390,_whole_genome_shotgun
GSONMT00068906001	95.0042	40.8284	0.0227047	2.32691	Uncharacterized
GSONMT00023305001	48.328	20.8202	0.0267359	2.32121	Uncharacterized
GSONMT00075024001	19.029	8.20276	0.0275077	2.31983	Chromosome_17_SCAF14532,_whole_genome_shotgun_sequence.
GSONMT00064582001	2.254	0.971756	0.0412822	2.31951	Uncharacterized_protein
GSONMT00082163001	73.3038	31.6274	0.0219475	2.31773	Uncharacterized
GSONMT00000546001	25.6945	11.1066	0.0201417	2.31344	Aspartate_aminotransferase,_cytoplasmic
GSONMT00040587001	1.5042	0.650253	0.0418539	2.31325	Uncharacterized_protein
GSONMT00003901001	9.82363	4.25321	0.01267	2.3097	Uncharacterized
GSONMT00079246001	4.03928	1.75022	0.0251808	2.30787	Uncharacterized
GSONMT00030160001	14.0934	6.12053	0.017454	2.30264	Fermitin_family_homolog
GSONMT00052524001	66.3313	28.8257	0.0461283	2.30112	Annexin
GSONMT00064588001	110.597	48.1248	0.0412822	2.29813	Glutamate_dehydrogenase_1,_mitochondrial
GSONMT00000976001	12.9886	5.66109	0.0392776	2.29436	Collagen_alpha-2(I)
GSONMT00068870001	4.11276	1.79342	0.0483514	2.29325	Serine/threonine-protein_kinase
GSONMT00065361001	2.36593	1.0329	0.0311542	2.29057	Uncharacterized
GSONMT00034621001	7.50377	3.28118	0.0378252	2.28691	UPI00020273EB_related
GSONMT00061436001	26.2529	11.4868	0.0304813	2.28548	Protein
GSONMT00061637001	6.96671	3.05284	0.0354097	2.28204	Chromosome_12_SCAF15007,_whole_genome_shotgun
GSONMT00060798001	45.6505	20.0362	0.0115562	2.2784	GIPC_PDZ_domain_containing_family,_member_1,_isoform
GSONMT00076130001	11.1442	4.90333	0.0373761	2.27278	Uncharacterized
GSONMT00000173001	14.1172	6.21966	0.0378252	2.26977	Uncharacterized
GSONMT00023598001	2.61611	1.15298	0.0412822	2.269	Phosphatidylinositol_3-kinase_regulatory_subunit
GSONMT00040402001	3.27058	1.44279	0.0345722	2.26684	T-complex_protein_11-like_protein
GSONMT00001078001	13.1686	5.8289	0.0282846	2.25919	Uncharacterized
GSONMT00034871001	38.1423	16.9162	0.0345722	2.25478	Glutamate_dehydrogenase_1,_mitochondrial
GSONMT00056452001	6.95662	3.09105	0.0425255	2.25057	Uncharacterized
GSONMT00033312001	179.829	80.0983	0.0260081	2.2451	Superoxide_dismutase
GSONMT00049325001	7.07121	3.15107	0.0498317	2.24407	Focal_adhesion_kinase
GSONMT00052009001	4.47579	1.99719	0.043876	2.24104	Protein
GSONMT00073347001	11.5435	5.15237	0.0227047	2.24043	Egl_nine_1-like
GSONMT00043166001	44.4509	19.8591	0.0267359	2.23831	Uncharacterized
GSONMT00068354001	154.815	69.553	0.0488613	2.22586	Iron-sulfur_cluster_assembly_enzyme_ISCU,
GSONMT00013859001	16.9986	7.64039	0.0136609	2.22483	ER_degradation-enhancing_alpha-mannosidase-like
GSONMT00014587001	2.39642	1.07763	0.0345722	2.22379	Uncharacterized_protein
GSONMT00037715001	290.722	130.768	0.0304813	2.22319	Chromosome_undetermined_SCAF11390,_whole_genome_shotgun
GSONMT00079417001	10.0967	4.54585	0.0136609	2.22108	Uncharacterized
GSONMT00061657001	12.8027	5.77531	0.0360674	2.2168	Riboflavin
GSONMT00033825001	24.1686	10.9096	0.0260081	2.21535	Uncharacterized
GSONMT00006374001	18.9221	8.55506	0.0251808	2.2118	AN1-type_zinc_finger_protein
GSONMT00019494001	63.4877	28.769	0.0326894	2.20681	Chromosome_undetermined_SCAF14565,_whole_genome_shotgun
GSONMT00077093001	8.04052	3.64786	0.0492766	2.20417	Uncharacterized
GSONMT00031758001	10.6766	4.8474	0.0472534	2.20254	Aryl_hydrocarbon_receptor_1
GSONMT00059543001	55.3586	25.1539	0.0166267	2.2008
GSONMT00052671001	13.5896	6.18175	0.0334882	2.19834	Uncharacterized
GSONMT00040585001	18.1345	8.25701	0.0466085	2.19626	Chromosome_undetermined_SCAF14676,_whole_genome_shotgun_sequence
GSONMT00045844001	46.873	21.3823	0.0311542	2.19214	Uncharacterized
GSONMT00019095001	46.525	21.2388	0.0243948	2.19057	Protein_tyrosine_phosphatase_type_IVA
GSONMT00000795001	39.1614	17.8791	0.0334882	2.19035	Histone
GSONMT00064201001	11.892	5.42995	0.0298821	2.19008	Uncharacterized
GSONMT00036163001	10.0896	4.614	0.0360674	2.18674	Uncharacterized
GSONMT00063102001	6.68356	3.07327	0.0444435	2.17474	Uncharacterized_protein
GSONMT00037425001	114.421	52.6178	0.0304813	2.17457	Uncharacterized
GSONMT00042477001	2.11282	0.974003	0.0425255	2.16921	Uncharacterized
GSONMT00004086001	37.7319	17.3973	0.034061	2.16884	Choline-phosphate_cytidylyltransferase
GSONMT00071580001	7.45626	3.44107	0.0418539	2.16684	Cyclic_AMP-dependent_transcription_factor_ATF-6_alpha-like
GSONMT00009410001	762.049	354.362	0.0466085	2.15048	Microsomal_glutathione_S-transferase
GSONMT00050997001	50.3503	23.4343	0.0267359	2.14857	Ogdh
GSONMT00043636001	3.22643	1.50212	0.0425255	2.14792	Uncharacterized_protein
GSONMT00030832001	4.1495	1.93283	0.0378252	2.14685	Actin-binding_protein
GSONMT00002681001	5.60407	2.62773	0.0488613	2.13267	Ramp2_protein
GSONMT00027808001	39.4227	18.4908	0.0345722	2.13202	Dipeptidyl-peptidase_1
GSONMT00081756001	10.3616	4.86282	0.0392776	2.13078	Protein
GSONMT00044073001	12.1895	5.72651	0.0444435	2.12861	Uncharacterized
GSONMT00000219001	18.8291	8.84897	0.0319734	2.12783	ATP-dependent_RNA_helicase
GSONMT00061347001	23.2238	10.9261	0.0401116	2.12553	LOC100158387
GSONMT00046771001	12.9402	6.08799	0.043876	2.12553	Uncharacterized_protein
GSONMT00007265001	102.89	48.4506	0.0345722	2.12361
GSONMT00063399001	14.4939	6.831	0.0311542	2.12178	Ribosome-recycling_factor,
GSONMT00016451001	5.50757	2.60253	0.0367644	2.11624	Uncharacterized_protein
GSONMT00047370001	4.33787	2.0509	0.0392776	2.11511	Uncharacterized
GSONMT00006703001	19.3126	9.14114	0.0488613	2.11271	Nucleolar_RNA_helicase_2
GSONMT00022708001	8.92705	4.23542	0.0466085	2.10771	Uncharacterized_protein
GSONMT00052814001	62.6351	29.7597	0.0466085	2.1047	Uncharacterized_protein
GSONMT00003855001	14.741	7.0245	0.0392776	2.09851	High_affinity_cationic_amino_acid_transporter
GSONMT00040168001	19.2222	9.18622	0.0461283	2.0925	ER_degradation-enhancing_alpha-mannosidase-like
GSONMT00017204001	65.4656	31.3692	0.0319734	2.08694	Uncharacterized
GSONMT00021661001	570.243	274.619	0.0360674	2.07649	Cytochrome_P450_3A27
GSONMT00046753001	3.83788	1.85891	0.0498317	2.06459	Uncharacterized
GSONMT00075630001	5.79566	2.80837	0.0444435	2.06371	Uncharacterized
GSONMT00038010001	64.0067	31.0604	0.0385678	2.06072	Polyadenylate-binding_protein-interacting_protein
GSONMT00047883001	6.05526	2.97933	0.0418539	2.03242	Uncharacterized
GSONMT00017234001	19.4789	38.9475	0.0492766	0.500132	Uncharacterized_protein
GSONMT00023278001	15.1155	30.733	0.0444435	0.491833	Uncharacterized_protein_(Fragment)
GSONMT00000170001	3.64741	7.42471	0.044947	0.491253	Receptor-binding_cancer_antigen_expressed_on_SiSo
GSONMT00034359001	16.4318	33.5196	0.0492766	0.490215	Uncharacterized
GSONMT00071879001	11.0768	22.6369	0.0373761	0.489325	26S_proteasome_non-ATPase_regulatory_subunit
GSONMT00002151001	7.72343	15.8312	0.0492766	0.487861	Uncharacterized
GSONMT00044710001	6.6633	13.7472	0.043876	0.484702	Phosphatidylinositol_glycan,_class
GSONMT00011344001	2.8501	5.88434	0.0455553	0.484353	Uncharacterized_protein
GSONMT00013079001	9.91995	20.5341	0.0461283	0.483096	Acidic_leucine-rich_nuclear_phosphoprotein_32_family_member
GSONMT00004105001	9.09609	18.8503	0.0405689	0.482544	Apolipoprotein
GSONMT00020611001	6.35537	13.2343	0.0498317	0.48022	Uncharacterized_protein
GSONMT00056073001	21.3479	44.4681	0.0418539	0.480072	Uncharacterized_protein
GSONMT00071007001	22.2239	46.4967	0.0488613	0.477967	Aspartate--tRNA_ligase,
GSONMT00071738001	8.15799	17.0726	0.0479219	0.477841	Uncharacterized_protein_(Fragment)
GSONMT00081962001	0.788894	1.65146	0.0492766	0.477695	Uncharacterized
GSONMT00073596001	36.1874	75.8571	0.0483514	0.477047	Cytochrome_c_oxidase_subunit_6A,
GSONMT00082819001	8.59523	18.0743	0.0405689	0.47555	14-3-3_protein
GSONMT00063397001	10.9144	23.0326	0.0360674	0.473867
GSONMT00045659001	14.4569	30.5514	0.0466085	0.473199	Uncharacterized
GSONMT00019794001	4.59124	9.72554	0.0444435	0.472081	Uncharacterized
GSONMT00071511001	4.9028	10.4496	0.0425255	0.469185	Uncharacterized
GSONMT00021433001	5.97391	12.74	0.0483514	0.46891	Uncharacterized_protein
GSONMT00011651001	8.09687	17.3488	0.034061	0.466711	Uncharacterized
GSONMT00067665001	13.0038	27.9698	0.0235501	0.464923	Endoplasmic_reticulum-Golgi_intermediate_compartment_protein
GSONMT00073277001	1.76178	3.8169	0.0472534	0.461574	Cysteine-rich_protein_2-binding
GSONMT00045817001	5.20307	11.2784	0.0334882	0.461331	Uncharacterized_protein_n=1
GSONMT00067885001	20.3321	44.1106	0.0166267	0.460935	3-mercaptopyruvate
GSONMT00055444001	2.93421	6.3717	0.0466085	0.460507	AP-4_complex_subunit
GSONMT00034957001	4.95295	10.787	0.0367644	0.459159	Phosphatidylinositol_N-acetylglucosaminyltransferase_subunit_H
GSONMT00073396001	5.98107	13.0275	0.0260081	0.459111	Uncharacterized_protein
GSONMT00064403001	1.64261	3.5781	0.0472534	0.459073	Uncharacterized
GSONMT00066998001	9.72846	21.1982	0.0267359	0.458929	Lysine--tRNA
GSONMT00007060001	3.66585	7.99783	0.0405689	0.458356	Ankyrin_repeat_family_A_protein
GSONMT00023482001	15.3721	33.5624	0.0392776	0.458016	Coagulation_factor
GSONMT00025300001	4.95395	10.819	0.0367644	0.457894	Eukaryotic_translation_initiation_factor_3_subunit
GSONMT00047782001	2.97281	6.51511	0.044947	0.456295	Uncharacterized_protein
GSONMT00031668001	5.76016	12.6326	0.0461283	0.455976	Uncharacterized_protein
GSONMT00080251001	15.1793	33.4794	0.0201417	0.453392	UPI0001DE5C25_related
GSONMT00071788001	5.79901	12.8132	0.017454	0.452581	Uncharacterized_protein
GSONMT00031685001	4.03173	8.93318	0.0290463	0.451321	Cyclic_AMP-dependent_transcription_factor
GSONMT00074485001	2.50588	5.55422	0.0235501	0.451167	Uncharacterized_protein
GSONMT00081542001	7.15395	15.8649	0.0210917	0.450929	Uncharacterized
GSONMT00002366001	3.63748	8.09452	0.0455553	0.449376	Uncharacterized_protein
GSONMT00079092001	26.1852	58.3109	0.0235501	0.449062	Chromosome_16_SCAF15113,_whole_genome_shotgun
GSONMT00042786001	1.47519	3.28572	0.0455553	0.44897	DCN1-like_protein
GSONMT00055727001	1.86168	4.15339	0.0378252	0.448231	Serine/threonine-protein_kinase
GSONMT00021669001	8.00852	17.9318	0.0378252	0.44661
GSONMT00073398001	5.13729	11.5047	0.0183534	0.446538	Uncharacterized_protein
GSONMT00007926001	6.09146	13.6653	0.0136609	0.445761	Uncharacterized
GSONMT00053786001	10.224	22.9567	0.0461283	0.44536	Uncharacterized_protein
GSONMT00062627001	4.48897	10.0912	0.0373761	0.44484
GSONMT00007198001	8.65501	19.4589	0.034061	0.444784	Uncharacterized_protein
GSONMT00035159001	2.57871	5.81977	0.0405689	0.443095	Transmembrane_protein
GSONMT00061845001	7.25939	16.4002	0.0319734	0.44264	Uncharacterized
GSONMT00047326001	8.55783	19.3524	0.0191868	0.44221	Inhibitor_of_differentiation
GSONMT00040512001	0.510937	1.15752	0.0219475	0.441407	Uncharacterized_protein
GSONMT00024336001	35.3978	80.1965	0.0227047	0.441388	Group_XIIA_secretory_phospholipase
GSONMT00032136001	18.6695	42.3271	0.0251808	0.441077	Chromosome_2_SCAF14695,_whole_genome_shotgun
GSONMT00061885001	3.28976	7.46221	0.0183534	0.440856	Uncharacterized_protein
GSONMT00049302001	2.80353	6.35968	0.034061	0.440829	TSC22_domain_family_protein
GSONMT00016670001	101.545	230.842	0.0290463	0.43989	Putative_uncharacterized_protein_LOC792613
GSONMT00070775001	2.03721	4.63404	0.0304813	0.439619	Uncharacterized_protein
GSONMT00056945001	16.271	37.0493	0.0191868	0.439172	Keratinocyte-associated_protein
GSONMT00060209001	5.17901	11.824	0.0166267	0.438008	Uncharacterized_protein
GSONMT00082334001	1.79934	4.11967	0.0219475	0.436768	Uncharacterized_protein_(Fragment)
GSONMT00012069001	5.99603	13.761	0.0251808	0.435726	Uncharacterized_protein
GSONMT00027687001	35.5768	81.7014	0.0191868	0.435449	Uncharacterized
GSONMT00076904001	2.18775	5.03471	0.044947	0.434533	Calcium-binding_mitochondrial_carrier_protein
GSONMT00019837001	7.95509	18.3098	0.0166267	0.434472	Uncharacterized
GSONMT00039784001	10.5531	24.3325	0.0191868	0.433704	Progesterone_receptor_membrane_component
GSONMT00052595001	9.8964	22.8603	0.0405689	0.432908
GSONMT00081017001	1.92142	4.4391	0.0298821	0.43284
GSONMT00063938001	10.6904	24.8356	0.00919502	0.430447	Uncharacterized
GSONMT00080163001	3.22698	7.50807	0.043876	0.429802	Cysteine_and_glycine-rich_protein
GSONMT00079645001	4.55768	10.6082	0.0146934	0.429637	Uncharacterized_protein
GSONMT00045563001	15.7228	36.6442	0.043876	0.429067	Phosphoethanolamine_N-methyltransferase,
GSONMT00068023001	1.05107	2.45046	0.0345722	0.428928
GSONMT00069153001	2.06809	4.83066	0.01267	0.428117	High_affinity_cationic_amino_acid_transporter
GSONMT00065823001	3.68442	8.61367	0.015681	0.427741	Chromosome_6_SCAF15017,_whole_genome_shotgun_sequence.
GSONMT00079101001	1.29638	3.03236	0.0290463	0.427515	Uncharacterized
GSONMT00080244001	5.85468	13.704	0.0418539	0.427224	Uncharacterized_protein_n=1
GSONMT00058866001	1.57452	3.68913	0.0183534	0.4268	Abhydrolase_domain-containing_protein
GSONMT00053067001	29.3561	68.7963	0.0311542	0.42671	Chromosome_undetermined_SCAF15092,_whole_genome_shotgun
GSONMT00015951001	4.19664	9.83894	0.0243948	0.426534	Uncharacterized
GSONMT00016499001	19.2615	45.1834	0.0136609	0.426296	S100_calcium_binding_protein
GSONMT00061511001	2.89278	6.79556	0.0405689	0.425687	C14orf119
GSONMT00066406001	4.95403	11.642	0.0183534	0.425531	Uncharacterized_protein
GSONMT00072706001	1.89908	4.46382	0.0235501	0.425438	Uncharacterized
GSONMT00013215001	2.89923	6.81624	0.0360674	0.425342	Uncharacterized
GSONMT00035037001	4.84704	11.3969	0.0136609	0.425295	Thioredoxin_domain-containing_protein
GSONMT00034590001	4.39222	10.3357	0.0326894	0.424956	Uncharacterized_protein
GSONMT00004293001	32.2285	75.8655	0.0183534	0.424811	Dynein_light_chain_2,
GSONMT00079733001	2.3863	5.61771	0.0298821	0.424782	UPF0766_protein
GSONMT00005218001	10.857	25.6076	0.0146934	0.423976	C17orf89
GSONMT00016425001	0.905756	2.1387	0.034061	0.423508	Uncharacterized_protein_(Fragment)
GSONMT00060797001	77.2579	182.495	0.00919502	0.423343	Thioredoxin-like
GSONMT00065603001	4.69112	11.0866	0.0166267	0.423134	Uncharacterized
GSONMT00049360001	0.375593	0.888198	0.0373761	0.422871	Serine/threonine-protein_kinase
GSONMT00008631001	19.7572	46.7949	0.0210917	0.422208	Mid1-interacting_protein
GSONMT00022905001	84.6963	201.027	0.0183534	0.421318	Membrane-spanning_4-domains_subfamily_A_member
GSONMT00071650001	2.92391	6.96259	0.0466085	0.419946	Uncharacterized_protein
GSONMT00034590001	3.36774	8.03525	0.0210917	0.419121	Uncharacterized_protein
GSONMT00061955001	2.75627	6.57806	0.0405689	0.41901	Whole_genome_shotgun_assembly,_allelic_scaffold_set,_scaffold_scaffoldA_1277
GSONMT00036010001	27.278	65.1465	0.00919502	0.418718	Gamma-secretase_subunit
GSONMT00059195001	5.63406	13.4633	0.0251808	0.418475	Chromosome_9_SCAF14729,_whole_genome_shotgun
GSONMT00054837001	2.25119	5.38482	0.0444435	0.418062
GSONMT00068814001	0.94801	2.27205	0.0326894	0.417249	Membrane_protein
GSONMT00061377001	26.3993	63.3729	0.0166267	0.416571	Signal_peptidase_complex_subunit
GSONMT00078402001	13.1053	31.4705	0.0104049	0.416431	Peroxisomal_2,4-dienoyl-CoA
GSONMT00076184001	5.88851	14.1777	0.0210917	0.415336	UPI00022B31E4_related
GSONMT00080271001	4.54349	10.9475	0.0227047	0.415025	Uncharacterized
GSONMT00005181001	2.95452	7.12172	0.0227047	0.41486	LOC100002393_protein
GSONMT00068025001	21.7713	52.4979	0.0243948	0.414708	Flavin
GSONMT00070737001	4.15044	10.0123	0.0235501	0.414534	Uncharacterized_protein
GSONMT00040213001	3.86523	9.33184	0.0251808	0.414198	Interferon-induced_guanylate-binding_protein_1_(Fragment)
GSONMT00076172001	14.2176	34.3619	0.00672588	0.413761	Dolichyl-diphosphooligosaccharide--protein_glycosyltransferase_subunit
GSONMT00008802001	4.07853	9.87744	0.034061	0.412914	Coiled-coil-helix-coiled-coil-helix_domain_containing
GSONMT00030565001	8.56791	20.7755	0.01267	0.412405	Gamma-secretase_subunit
GSONMT00078303001	1.32748	3.21995	0.0251808	0.412267	Coiled-coil_domain-containing_protein
GSONMT00016422001	30.4803	74.1574	0.0115562	0.411022	Selenoprotein
GSONMT00031502001	10.6909	26.0342	0.00919502	0.410648	Nitric_oxide_synthase-interacting
GSONMT00080283001	1.64173	4.00166	0.01267	0.410262	Zgc:113338
GSONMT00023774001	5.12006	12.4926	0.0267359	0.409847	Uncharacterized
GSONMT00066870001	1.0305	2.52014	0.0227047	0.408906	Rap_guanine_nucleotide_exchange_factor
GSONMT00022335001	2.76122	6.75797	0.0201417	0.408587	Transmembrane_protein
GSONMT00008264001	3.30683	8.09408	0.0183534	0.408549	COMM_domain-containing_protein_7
GSONMT00038342001	18.7715	46.0206	0.00800839	0.407893	Chromosome_5_SCAF14773,_whole_genome_shotgun
GSONMT00041745001	1.8164	4.45912	0.0136609	0.407345	Chromosome_undetermined_SCAF7270,_whole_genome_shotgun_sequence._(Fragment)
GSONMT00063737001	17.5515	43.1161	0.0227047	0.407075	Uncharacterized_protein
GSONMT00071929001	2.05367	5.0517	0.0201417	0.40653	Uncharacterized_protein
GSONMT00074535001	15.9143	39.1709	0.0146934	0.406279	CD302
GSONMT00001183001	2.69073	6.63913	0.0385678	0.405284	UPI00020F5962_related
GSONMT00077195001	4.87392	12.0375	0.0210917	0.404895	Glutamine
GSONMT00051279001	2.80925	6.94384	0.0136609	0.404567	Uncharacterized_protein
GSONMT00004439001	22.9812	56.822	0.00210953	0.404442	Signal_peptidase_complex_subunit
GSONMT00074583001	1.58737	3.92831	0.00919502	0.404085	Uncharacterized_protein_n=1
GSONMT00010247001	1.80555	4.46883	0.0425255	0.404032	ATP-citrate
GSONMT00028067001	12.7464	31.5732	0.0304813	0.403709	UPI0002026FEA_related
GSONMT00067683001	42.3751	105.125	0.00532933	0.403093	Dynein_light_chain_2,
GSONMT00031326001	6.92354	17.2741	0.0183534	0.400805	Uncharacterized_protein
GSONMT00013157001	6.94748	17.3636	0.015681	0.400117	SOSS_complex_subunit
GSONMT00000848001	56.6576	141.614	0.017454	0.400085	Delta-6_fatty_acyl_desaturase_(Fragment)
GSONMT00045890001	1.15082	2.88279	0.0201417	0.399204	Transcriptional_repressor
GSONMT00074486001	2.49964	6.26363	0.034061	0.399072	Uncharacterized
GSONMT00033935001	5.48798	13.7547	0.0235501	0.398989	Ggh
GSONMT00034924001	1.65486	4.15477	0.0166267	0.398304	Uncharacterized_protein
GSONMT00041353001	5.81673	14.6045	0.0136609	0.398283	C-Myc-binding
GSONMT00021370001	2.85891	7.18179	0.0405689	0.398078	Uncharacterized_protein
GSONMT00046548001	1.44547	3.63276	0.0405689	0.397899	Uncharacterized
GSONMT00012324001	33.7865	85.0592	0.0378252	0.397212	Putative_uncharacterized_protein
GSONMT00027749001	2.41218	6.08774	0.0326894	0.396236	Uncharacterized_protein
GSONMT00082675001	1.37258	3.48944	0.017454	0.393353	Procollagen-proline,_2-oxoglutarate_4-dioxygenase_(Proline_4-hydroxylase),_alpha_polypeptide
GSONMT00075788001	85.7876	218.224	0.0115562	0.393117	Epididymal_secretory_protein
GSONMT00053764001	2.1709	5.54256	0.0483514	0.391678	Uncharacterized_protein
GSONMT00026206001	1.68986	4.32826	0.044947	0.390425	Uncharacterized
GSONMT00037137001	3.44212	8.83181	0.0334882	0.389741	Nonclassical_MHC_class_I_antigen
GSONMT00062335001	8.13269	20.8927	0.00380702	0.38926	High_affinity_copper_uptake_protein
GSONMT00057193001	4.10806	10.5622	0.0455553	0.38894	Uncharacterized_protein
GSONMT00058565001	507.826	1306.54	0.0191868	0.38868	Cathepsin
GSONMT00044113001	19.6748	50.7467	0.00532933	0.387706	Cytochrome_c_oxidase_subunit_7A2,
GSONMT00045576001	5.101	13.165	0.00672588	0.387467	Uncharacterized_protein_(Fragment)
GSONMT00065496001	5.98256	15.4694	0.0219475	0.386735	Predicted
GSONMT00073397001	3.73291	9.66189	0.0405689	0.386354	Uncharacterized_protein
GSONMT00057817001	0.517786	1.34259	0.0466085	0.385662	Uncharacterized_protein_(Fragment)
GSONMT00055900001	23.9073	62.0946	0.00672588	0.385014	Mid1-interacting_protein
GSONMT00008054001	7.45677	19.3882	0.00672588	0.384604	Proteasome_subunit_alpha
GSONMT00020483001	146.735	382.543	0.0275077	0.383578	Uncharacterized_protein
GSONMT00021060001	2.82844	7.39218	0.00380702	0.382626	Gamma-secretase_subunit
GSONMT00067921001	2.42391	6.34092	0.0191868	0.382265	RAD52_motif-containing_protein
GSONMT00003226001	2.03338	5.32201	0.0235501	0.38207
GSONMT00068614001	7.84827	20.6437	0.00380702	0.380177	Uncharacterized
GSONMT00067744001	5.02775	13.2495	0.00672588	0.379467	Uncharacterized_protein_(Fragment)
GSONMT00037274001	1.49904	3.95258	0.0115562	0.379256
GSONMT00046998001	1.43392	3.78159	0.017454	0.379184	Uncharacterized_protein
GSONMT00017178001	1.08448	2.86153	0.0251808	0.378986	Uncharacterized_protein_(Fragment)
GSONMT00045283001	71.2522	188.168	0.0319734	0.378663	Uncharacterized_protein
GSONMT00016097001	25.7015	67.9314	0.00380702	0.378345	Y-box-binding_protein_2-A
GSONMT00054077001	2.67468	7.07431	0.00380702	0.378084	Uncharacterized_protein
GSONMT00048770001	1.40402	3.71834	0.0260081	0.377593	Uncharacterized
GSONMT00081837001	7.70008	20.3955	0.0483514	0.377538	Methylenetetrahydrofolate
GSONMT00067865001	4.26165	11.2934	0.0146934	0.377358	Uncharacterized
GSONMT00067881001	1.35215	3.58842	0.0378252	0.376809	Uncharacterized_protein
GSONMT00048035001	6.38991	16.9708	0.0166267	0.376524	PKHD_domain-containing_transmembrane
GSONMT00002122001	0.680422	1.81028	0.0251808	0.375866	Twinkle_protein,
GSONMT00045817001	2.74657	7.33386	0.00800839	0.374505	Uncharacterized_protein_n=1
GSONMT00065950001	11.0769	29.5938	0.00672588	0.374298	Acyl-CoA_synthetase_family_member_2,
GSONMT00066456001	2.90223	7.75556	0.0146934	0.374213	Uncharacterized
GSONMT00062862001	1.99667	5.34335	0.017454	0.373674	Flap_endonuclease
GSONMT00037378001	2.73925	7.33463	0.0345722	0.373468	Uncharacterized_protein
GSONMT00065953001	15.6211	41.8321	0.0104049	0.373424	Acyl-CoA_synthetase_family_member_2,
GSONMT00027278001	4.47497	11.9876	0.00380702	0.3733	UPI00022B1154_related
GSONMT00067651001	4.07682	10.9211	0.00672588	0.373298	Uncharacterized
GSONMT00003604001	7.29286	19.5459	0.0104049	0.373115	Eukaryotic_translation_initiation_factor_3_subunit
GSONMT00044504001	1.86461	5.00453	0.00380702	0.372584	Uncharacterized_protein_(Fragment)
GSONMT00031214001	78.241	210.159	0.01267	0.372294	Uncharacterized
GSONMT00007054001	2.31083	6.21093	0.01267	0.372059	Uncharacterized
GSONMT00021076001	60.2792	162.087	0.0345722	0.371894	Uncharacterized
GSONMT00078401001	3.76278	10.1215	0.0136609	0.371761	Retinol_dehydrogenase
GSONMT00080903001	2.30388	6.21241	0.0492766	0.370851	Heat_shock_protein_HSP
GSONMT00014792001	3.39259	9.17527	0.00672588	0.369754	Uncharacterized_protein
GSONMT00065824001	1.08359	2.94103	0.0311542	0.368439	Putative_uncharacterized_protein_LOC792613
GSONMT00044633001	0.821445	2.22958	0.00800839	0.36843	Uncharacterized_protein
GSONMT00001262001	1.39552	3.79338	0.01267	0.367883	Uncharacterized
GSONMT00013612001	98.2606	267.864	0.00210953	0.36683	Insulin-like_growth_factor-binding_protein_2b_transcript_variant_2
GSONMT00033888001	6.68751	18.2601	0.0136609	0.366236	Uncharacterized
GSONMT00035038001	2.67316	7.30548	0.00532933	0.365912	Uncharacterized
GSONMT00031111001	6.69211	18.2983	0.00380702	0.365723	Uncharacterized
GSONMT00041056001	0.988876	2.70504	0.0227047	0.365568	UPI00017601E8_related
GSONMT00082132001	1.38958	3.80424	0.0282846	0.365271	F-box-like/WD_repeat-containing_protein
GSONMT00063662001	4.40451	12.0662	0.0115562	0.365029	V-type_proton_ATPase_subunit_C
GSONMT00055107001	1.38301	3.79108	0.0373761	0.364806	Uncharacterized
GSONMT00057596001	66.833	183.238	0.0360674	0.364733	Uncharacterized
GSONMT00079632001	3.43556	9.4392	0.00210953	0.363967	NAD-dependent_protein_deacylase_sirtuin-5,_mitochondrial
GSONMT00073661001	1.40592	3.8637	0.0235501	0.363879	Transmembrane_protein
GSONMT00001311001	10.5347	28.968	0.00672588	0.363667	Proteasome_subunit_beta
GSONMT00052706001	18.3785	50.7686	0.00210953	0.362005	Uncharacterized_protein
GSONMT00004970001	0.936374	2.5954	0.0227047	0.360782	Ribosomal_protein_S6_kinase
GSONMT00017767001	1.59961	4.43605	0.0243948	0.360593	Peptidyl-prolyl_cis-trans_isomerase_FKBP1B
GSONMT00008749001	0.468818	1.30065	0.01267	0.360449	Phospholipase_C_epsilon_1
GSONMT00071534001	1.64896	4.57895	0.0210917	0.360117	Uncharacterized_protein
GSONMT00063640001	2.96259	8.2341	0.00210953	0.359795
GSONMT00052295001	1.00042	2.78304	0.00380702	0.35947	Dedicator_of_cytokinesis_protein
GSONMT00010628001	6.57709	18.3055	0.00210953	0.359296	Xylose_isomerase_n=2
GSONMT00013369001	2.14891	5.98987	0.0304813	0.358757	KDEL_motif-containing_protein
GSONMT00039078001	20.2826	56.6354	0.00210953	0.358126	Sterol-4-alpha-carboxylate_3-dehydrogenase,
GSONMT00052620001	636.415	1780.57	0.00800839	0.357422	Oligosaccharyltransferase_complex_subunit
GSONMT00038129001	3.78069	10.5923	0.00380702	0.356928	RuvB-like
GSONMT00023626001	0.984703	2.76095	0.0275077	0.356654	Ras-related_protein
GSONMT00053621001	1.62407	4.5552	0.0412822	0.356531	Patatin-like_phospholipase_domain-containing_protein
GSONMT00049981001	7.41564	20.8097	0.00380702	0.356355	Uncharacterized
GSONMT00025278001	4.05163	11.3999	0.00210953	0.355409	KISS1_isoform
GSONMT00021077001	10.6384	29.9362	0.0136609	0.355369	UPI00022B30DF_related
GSONMT00025514001	1.9633	5.53002	0.00532933	0.355026	Ras-related_protein
GSONMT00049922001	5.1951	14.667	0.00672588	0.354203	COMM_domain-containing_protein
GSONMT00054891001	3.66302	10.3433	0.00210953	0.354144	Activin_receptor
GSONMT00076866001	1.31736	3.72008	0.017454	0.354121	Trans-1,2-dihydrobenzene-1,2-diol
GSONMT00002267001	1.24495	3.51953	0.00210953	0.353726	Uncharacterized_protein
GSONMT00022728001	14.069	39.7914	0.00210953	0.353569	PKHD_domain-containing_transmembrane
GSONMT00069859001	4.16406	11.8077	0.00672588	0.352656	Cathepsin
GSONMT00026056001	0.748939	2.12643	0.0461283	0.352205	Uncharacterized
GSONMT00026184001	16.3519	46.5151	0.00532933	0.35154	S-adenosylmethionine_synthase_isoform
GSONMT00061862001	5.57325	15.8612	0.0479219	0.351376	Chromosome_10_SCAF9027,_whole_genome_shotgun_sequence
GSONMT00002017001	5.09977	14.5224	0.00380702	0.351166	Transmembrane_and_TPR_repeat-containing_protein
GSONMT00001755001	3.27909	9.34082	0.00800839	0.351049	Uncharacterized
GSONMT00080549001	2.01503	5.74609	0.01267	0.350678	Glutamine_synthetase,
GSONMT00032003001	9.00679	25.698	0.00210953	0.350486	Uncharacterized_protein
GSONMT00038481001	9.86479	28.1592	0.00210953	0.350322	Putative_uncharacterized_protein
GSONMT00001314001	4.36627	12.4937	0.017454	0.349478	Proteasome_subunit_beta
GSONMT00060258001	1.91934	5.49713	0.00210953	0.349153	Peripheral_plasma_membrane_protein
GSONMT00070096001	27.0301	77.5334	0.00210953	0.348625	Chromosome_5_SCAF14773,_whole_genome_shotgun
GSONMT00076916001	1.65525	4.74997	0.00380702	0.348476
GSONMT00012432001	17.2382	49.5575	0.044947	0.347842	cDNA:_FLJ21107_fis,_clone
GSONMT00069112001	1.42247	4.09326	0.00800839	0.347515	Uncharacterized_protein_(Fragment)
GSONMT00023015001	1.36572	3.93274	0.0104049	0.347269	Uncharacterized
GSONMT00023038001	1.06264	3.06013	0.017454	0.347253	Methyltransferase-like_protein
GSONMT00005310001	1.62059	4.67392	0.00800839	0.34673	Uncharacterized
GSONMT00000228001	2.60747	7.52154	0.0191868	0.346667	SLAM_family_member_7
GSONMT00069403001	26.8219	77.4292	0.00210953	0.346405	Peptidyl-prolyl_cis-trans_isomerase
GSONMT00037768001	1.68853	4.88158	0.00210953	0.345898	Serine/threonine-protein_phosphatase_2A_catalytic_subunit_alpha
GSONMT00000340001	4.07856	11.8792	0.00919502	0.343336	Uncharacterized_protein_(Fragment)
GSONMT00065219001	2.05795	6.00518	0.00532933	0.342696	Uncharacterized_protein
GSONMT00067668001	1.89314	5.52786	0.0219475	0.342472	Phosphatidate_phosphatase
GSONMT00030283001	2.7189	7.94029	0.0275077	0.342418	Uncharacterized
GSONMT00069187001	1.54489	4.52069	0.0290463	0.341738
GSONMT00022899001	9.02222	26.4043	0.00210953	0.341695	UBX_domain-containing_protein
GSONMT00034192001	14.1903	41.6159	0.0201417	0.340983	60S_ribosomal_protein
GSONMT00062737001	6.10409	17.9077	0.0431353	0.340864	Uncharacterized
GSONMT00007251001	11.9492	35.0634	0.00672588	0.340788	Uncharacterized_protein
GSONMT00051468001	7.16117	21.0181	0.00672588	0.340714	Cyclin-dependent_kinase_inhibitor_1B
GSONMT00025854001	3.96703	11.6607	0.00210953	0.340205	Uncharacterized
GSONMT00079204001	0.550201	1.6174	0.0304813	0.340176	Caspase-activated
GSONMT00013204001	6.17081	18.1688	0.00919502	0.339638	Chromosome_undetermined_SCAF14764,_whole_genome_shotgun
GSONMT00080847001	0.411499	1.21341	0.0104049	0.339126	Uncharacterized_protein
GSONMT00068126001	8.48773	25.1117	0.00380702	0.337999	Acyl-CoA:lysophosphatidylglycerol_acyltransferase
GSONMT00031325001	1.31024	3.88388	0.0183534	0.337353	G1/S-specific
GSONMT00041306001	53.6421	160.02	0.00380702	0.335221	Uncharacterized
GSONMT00065176001	10.9284	32.6634	0.00380702	0.334576	Uncharacterized
GSONMT00068615001	7.59996	22.7257	0.00210953	0.334421	Uncharacterized_protein
GSONMT00044744001	0.639774	1.91314	0.0378252	0.33441	Uncharacterized_protein
GSONMT00056932001	1.13657	3.40338	0.0227047	0.333953	Dedicator_of_cytokinesis_protein
GSONMT00081382001	2.96842	8.8984	0.0146934	0.33359	Uncharacterized
GSONMT00072262001	13.6487	40.9996	0.00532933	0.332898	Orphan_nuclear_receptor
GSONMT00049988001	1.56988	4.71613	0.0136609	0.332875	Ras-related_protein
GSONMT00071929001	1.2029	3.61394	0.00800839	0.33285	Uncharacterized_protein
GSONMT00050547001	31.267	94.134	0.0282846	0.332154	Uncharacterized_protein_(Fragment)
GSONMT00058882001	0.862852	2.60175	0.0373761	0.331643	Uncharacterized_protein
GSONMT00006838001	2.4327	7.34018	0.00919502	0.331422	U6_snRNA-associated_Sm-like_protein
GSONMT00082830001	0.605026	1.82926	0.0360674	0.330749	UPI00022B158C_related
GSONMT00078104001	1.54058	4.66347	0.00672588	0.330351	Uncharacterized_protein_(Fragment)
GSONMT00067834001	1.00798	3.05653	0.0104049	0.329779	WSC_domain-containing_protein
GSONMT00077136001	1.46852	4.45397	0.00532933	0.32971	Uncharacterized_protein
GSONMT00074580001	0.785431	2.38242	0.0345722	0.329678	Bardet-Biedl_syndrome_5_protein
GSONMT00032725001	78.9562	239.521	0.00210953	0.329642	Oligosaccharyltransferase_complex_subunit
GSONMT00065107001	1.24757	3.78742	0.0412822	0.329398
GSONMT00050133001	12.9058	39.2781	0.00210953	0.328575	Uncharacterized
GSONMT00080453001	0.727316	2.22322	0.0472534	0.327145	Uncharacterized
GSONMT00013812001	23.7233	72.5241	0.00210953	0.327109	Uncharacterized
GSONMT00058114001	1.0268	3.15796	0.0488613	0.325147	Mitogen-activated_protein_kinase
GSONMT00013216001	3.16392	9.73623	0.00210953	0.324964	Uncharacterized
GSONMT00023930001	0.371644	1.14526	0.0290463	0.324506	Fish_virus_induced_TRIM
GSONMT00037681001	0.623511	1.92573	0.0479219	0.323779	Caspase
GSONMT00007673001	7.73034	23.8763	0.00210953	0.323766	Cell_division_cycle_protein_123
GSONMT00076249001	0.532093	1.64394	0.0267359	0.323669	Uncharacterized_protein
GSONMT00039237001	1.53921	4.75755	0.00210953	0.32353	Protein_O-mannosyl-transferase
GSONMT00048279001	1.55775	4.82394	0.0334882	0.322921	Chromosome_20_open_reading_frame_44,_isoform
GSONMT00077831001	35.3124	109.451	0.0498317	0.322632	Uncharacterized
GSONMT00053572001	1.07704	3.34076	0.0282846	0.322394	Protein_phosphatase_1_regulatory_subunit
GSONMT00020483001	34.9631	109.001	0.00380702	0.320759	Uncharacterized_protein
GSONMT00011985001	3.06399	9.55363	0.00210953	0.320715	FYN-binding
GSONMT00026582001	1.39576	4.35878	0.00210953	0.320218	Uncharacterized
GSONMT00007672001	32.8077	102.635	0.00210953	0.319654	ADP-sugar
GSONMT00059087001	0.534536	1.67611	0.0191868	0.318915	Novel_protein
GSONMT00047521001	0.494119	1.55371	0.0367644	0.318025	Transmembrane_emp24_domain-containing_protein
GSONMT00075344001	1.9792	6.24618	0.0405689	0.316866
GSONMT00009853001	4.18847	13.2346	0.017454	0.316479	Unconventional
GSONMT00036938001	0.50783	1.605	0.0373761	0.316405	Chromosome_2_SCAF14738,_whole_genome_shotgun
GSONMT00012761001	8.77207	27.7846	0.00210953	0.315717	Cysteine_sulfinic_acid
GSONMT00015987001	1.5427	4.88976	0.017454	0.315496	Citrate
GSONMT00080466001	1.94233	6.16924	0.0115562	0.314841	PQ_loop_repeat-containing_protein
GSONMT00059187001	0.998531	3.17358	0.0219475	0.314639	Dehydroquinate_synthase-like_protein_n=1
GSONMT00080012001	3.01024	9.57418	0.00210953	0.314412	RNA-binding_motif,_single-stranded-interacting_protein
GSONMT00070115001	1.27463	4.06036	0.01267	0.31392	RUN_and_FYVE_domain-containing_protein
GSONMT00063801001	1.74171	5.55849	0.0444435	0.313342	Gamma-aminobutyric_acid_receptor-associated_protein-like
GSONMT00000574001	9.36802	29.9057	0.00210953	0.313252	Uncharacterized_protein
GSONMT00058970001	0.577052	1.84228	0.015681	0.313227	Uncharacterized_protein
GSONMT00063433001	4.14762	13.2679	0.00800839	0.312606	Transmembrane_protein
GSONMT00003087001	1.23379	3.95605	0.00380702	0.311874	Uncharacterized
GSONMT00019980001	4.79632	15.4119	0.00210953	0.311209	UPI0002026D19_related
GSONMT00038643001	2.10705	6.77964	0.00919502	0.310791	Transcription_elongation_factor_1
GSONMT00029482001	1.24196	4.00378	0.0290463	0.310197	C9orf142_homolog
GSONMT00074986001	0.630813	2.03888	0.0412822	0.309392	Hepatocyte_nuclear_factor
GSONMT00014217001	0.562231	1.81856	0.0282846	0.309163	Mitochondrial_ubiquitin_ligase_activator_of_NFKB
GSONMT00015294001	2.10246	6.83248	0.0251808	0.307716	Chromosome_11_SCAF14528,_whole_genome_shotgun_sequence
GSONMT00010354001	10.4774	34.0646	0.00210953	0.307574	Uncharacterized_protein_(Fragment)
GSONMT00065468001	1.52227	4.95351	0.00210953	0.307311	Interferon-induced_protein_with_tetratricopeptide_repeats
GSONMT00060830001	2.13209	6.95519	0.00919502	0.306547	Uncharacterized
GSONMT00078004001	253.547	827.993	0.015681	0.306219	Peptidyl-prolyl_cis-trans_isomerase
GSONMT00012673001	6.18362	20.2463	0.00210953	0.30542	Chromosome_10_SCAF15019,_whole_genome_shotgun_sequence
GSONMT00018040001	4.70701	15.4218	0.00210953	0.305218	Novel
GSONMT00055017001	0.896982	2.9398	0.00800839	0.305117	Cysteine/serine-rich_nuclear_protein
GSONMT00079318001	4.99046	16.3578	0.00210953	0.305081	Chromosome_4_SCAF14575,_whole_genome_shotgun
GSONMT00067864001	3.06113	10.0457	0.00210953	0.30472	Uncharacterized
GSONMT00030395001	8.95328	29.4958	0.00210953	0.303544	Cysteine_sulfinic_acid
GSONMT00054989001	0.52728	1.73952	0.0290463	0.303118	Uncharacterized
GSONMT00048421001	1.09691	3.62668	0.0166267	0.302456	Uncharacterized_protein
GSONMT00079312001	0.982337	3.24988	0.0104049	0.302269	Uncharacterized
GSONMT00066199001	16.0454	53.3597	0.00210953	0.300703	Ell2
GSONMT00067794001	1.59617	5.32431	0.00210953	0.299789	Uncharacterized
GSONMT00052538001	0.883375	2.95402	0.00532933	0.299042	Selenide,_water_dikinase
GSONMT00048182001	2.43863	8.17479	0.00210953	0.298311	Interferon-induced_guanylate-binding_protein
GSONMT00027833001	1.04192	3.49802	0.00210953	0.29786	Uncharacterized
GSONMT00071929001	0.87982	2.956	0.00210953	0.297639	Uncharacterized_protein
GSONMT00069976001	1.66008	5.59108	0.0219475	0.296916	Prolyl_3-hydroxylase
GSONMT00017559001	3.09414	10.4476	0.0146934	0.296158	Uncharacterized_protein
GSONMT00025257001	25.3852	85.7415	0.00210953	0.296067	Elongation_of_very_long_chain_fatty_acids_protein
GSONMT00048659001	1.08047	3.65373	0.0219475	0.295717	Ubiquitin_carboxyl-terminal_hydrolase
GSONMT00000562001	5.69566	19.3392	0.00210953	0.294514	Eukaryotic_translation_initiation_factor
GSONMT00049562001	14.3972	48.8856	0.00210953	0.294508	Uncharacterized
GSONMT00003644001	3.48403	11.9942	0.00210953	0.290476	Desumoylating_isopeptidase
GSONMT00053454001	0.690475	2.37879	0.01267	0.290263	Leucine-rich_repeat-containing_protein
GSONMT00059992001	2.76915	9.55633	0.00532933	0.289771	Uncharacterized
GSONMT00027974001	20.4917	70.776	0.00210953	0.289529	Gamma-interferon-inducible_lysosomal_thiol
GSONMT00052854001	1.23835	4.27769	0.00210953	0.28949	Uncharacterized
GSONMT00082167001	10.0479	34.7095	0.00210953	0.289486	Insulin-induced_gene_1
GSONMT00021035001	91.3318	315.787	0.00210953	0.28922	UPI000194C71C_related
GSONMT00018364001	10.8728	37.6776	0.00210953	0.288575	Interferon-induced_protein_44
GSONMT00067581001	2.07492	7.19807	0.00210953	0.288261	Serine/threonine-protein_kinase
GSONMT00066441001	1.64046	5.69839	0.0367644	0.287881	Claudin
GSONMT00050272001	11.1177	38.6445	0.00210953	0.287692	Uncharacterized
GSONMT00077832001	4.69863	16.4224	0.0115562	0.286111	Phosphoglucomutase-1
GSONMT00059675001	14.1387	49.4573	0.00210953	0.285877	Uncharacterized
GSONMT00024732001	1.27031	4.46191	0.0267359	0.284701	Protein_N-terminal_glutamine
GSONMT00022530001	0.731468	2.58412	0.0461283	0.283063	Chromosome_11_SCAF14479,_whole_genome_shotgun
GSONMT00029039001	4.31589	15.3018	0.00210953	0.282051
GSONMT00035886001	6.29017	22.3028	0.0210917	0.282035	Uncharacterized_protein
GSONMT00055869001	6.33351	22.4708	0.00210953	0.281855	Rho-related_GTP-binding_protein
GSONMT00002695001	17.5336	62.3029	0.0290463	0.281425	Uncharacterized
GSONMT00026181001	14.2799	50.7424	0.00210953	0.281419	Uncharacterized
GSONMT00048688001	194.138	694.389	0.00210953	0.279581	Uncharacterized_protein_(Fragment)
GSONMT00022551001	1.18026	4.22464	0.0479219	0.279375	Mitogen-activated_protein_kinase_kinase_kinase
GSONMT00016282001	5.05586	18.1052	0.00210953	0.279249	Interferon-gamma_receptor_2_(Fragment)
GSONMT00028382001	12.8511	46.0218	0.00210953	0.279239	Eukaryotic_translation_initiation_factor_2_subunit
GSONMT00080026001	0.277701	0.99875	0.00672588	0.278049	Uncharacterized
GSONMT00076909001	4.93699	17.8	0.00210953	0.277359	Novel_protein
GSONMT00021029001	4.12303	14.889	0.00210953	0.276918	BMP_and_activin_membrane-bound_inhibitor
GSONMT00042086001	0.389772	1.40818	0.0483514	0.276791	OX-2_membrane
GSONMT00062104001	2.43529	8.80444	0.00532933	0.276598	Uncharacterized_protein
GSONMT00050596001	2.24972	8.13748	0.00210953	0.276464	DNA_damage-inducible_transcript_4-like
GSONMT00070982001	2.66119	9.63874	0.017454	0.276093	UPF0733_protein_C2orf88
GSONMT00040360001	5.70558	20.6755	0.00532933	0.275959	Four_and_a_half_LIM_domains_protein
GSONMT00025402001	31.7821	115.253	0.00210953	0.275759	7-dehydrocholesterol_reductase
GSONMT00037530001	6.89073	25.0297	0.00210953	0.275302	Uncharacterized
GSONMT00021288001	14.757	53.7621	0.00210953	0.274487	Cell_division_cycle_protein_123-like
GSONMT00059781001	16.8405	61.521	0.00919502	0.273736	Uncharacterized
GSONMT00040381001	2.70447	9.89831	0.00210953	0.273225	Uncharacterized_protein
GSONMT00076075001	1.1495	4.21447	0.0104049	0.272751	Prolyl_3-hydroxylase
GSONMT00076191001	0.435108	1.60895	0.0260081	0.27043	Calcium-activated_potassium_channel_subunit
GSONMT00025821001	1.11289	4.13781	0.00672588	0.268956	Uncharacterized
GSONMT00072382001	2.45595	9.13767	0.00210953	0.268772	ZIP_zinc_uptake_transporter
GSONMT00062562001	21.857	81.4877	0.00210953	0.268225	Digestive_cysteine_proteinase
GSONMT00075940001	0.289604	1.07982	0.0479219	0.268197	Uncharacterized
GSONMT00029941001	0.569993	2.12914	0.0319734	0.26771	Uncharacterized
GSONMT00038267001	68.3632	255.458	0.00210953	0.26761	Uncharacterized_protein
GSONMT00068613001	44.1545	165.206	0.00210953	0.267269	Uncharacterized
GSONMT00062707001	77.2747	289.952	0.00210953	0.266509	Mesencephalic_astrocyte-derived_neurotrophic
GSONMT00080773001	34.4668	129.595	0.00210953	0.265958	CD59-like
GSONMT00081536001	2.31176	8.7076	0.00210953	0.265488	Novel_protein_containing_an_EGF-like_domain
GSONMT00022433001	3.82429	14.4338	0.00210953	0.264954	Uncharacterized
GSONMT00079023001	8.57766	32.4484	0.00210953	0.264348	Chromosome_16_SCAF15002,_whole_genome_shotgun_sequence._(Fragment)
GSONMT00008250001	4.11554	15.5739	0.00210953	0.264259	Uncharacterized
GSONMT00079749001	0.64106	2.43046	0.0326894	0.263761	Uncharacterized
GSONMT00058588001	6.30608	23.9682	0.00210953	0.263102	Crumbs_homolog_3a
GSONMT00044197001	1.31987	5.02786	0.00210953	0.262511	Dynein_light_chain_4,
GSONMT00029941001	0.836842	3.19839	0.00210953	0.261645	Uncharacterized
GSONMT00021145001	52.7127	201.486	0.00210953	0.26162	PREDICTED:_LOW_QUALITY_PROTEIN:_fatty_acid_desaturase_2
GSONMT00053490001	73.2694	280.473	0.00210953	0.261235	Uncharacterized
GSONMT00054658001	0.756783	2.90272	0.0243948	0.260715	C12orf32_homolog
GSONMT00045855001	0.807411	3.10094	0.01267	0.260376	Novel_protein
GSONMT00059695001	0.562149	2.16143	0.00210953	0.260082	Uncharacterized
GSONMT00027134001	4.25292	16.3813	0.00210953	0.25962	Uncharacterized
GSONMT00015043001	0.564798	2.17553	0.00800839	0.259614	Uncharacterized_protein_(Fragment)
GSONMT00046600001	7.94877	30.6541	0.00210953	0.259305	Transforming_protein
GSONMT00024843001	0.327656	1.26634	0.0304813	0.258743	Suppressor_of_cytokine_signaling
GSONMT00037649001	0.419152	1.62621	0.00210953	0.257748	Chromosome_undetermined_SCAF7270,_whole_genome_shotgun_sequence._(Fragment)
GSONMT00066991001	9.04177	35.1176	0.00210953	0.257471	Cytochrome
GSONMT00006828001	0.491946	1.91481	0.0444435	0.256916	Uncharacterized
GSONMT00077603001	0.338003	1.31616	0.0136609	0.25681	FCH_and_double_SH3_domains_protein
GSONMT00068006001	0.58945	2.29547	0.017454	0.256788	Uncharacterized
GSONMT00053444001	0.468364	1.82815	0.00210953	0.256196	Novel_protein
GSONMT00076864001	0.813389	3.17689	0.00210953	0.256033	GDP-fucose_protein_O-fucosyltransferase
GSONMT00008197001	1.83918	7.22864	0.00800839	0.25443	ATP_synthase_subunit_e,
GSONMT00020202001	7.43002	29.2923	0.0260081	0.253651	Uncharacterized_protein
GSONMT00007161001	12.0097	47.3754	0.00210953	0.253501	C6orf105
GSONMT00049558001	1.21316	4.78677	0.00210953	0.25344	Delta-aminolevulinic_acid
GSONMT00039960001	1.05201	4.15984	0.00210953	0.252897	Chromosome_9_SCAF14729,_whole_genome_shotgun_sequence
GSONMT00081607001	0.839768	3.32087	0.00380702	0.252876	GDP-fucose_protein_O-fucosyltransferase
GSONMT00043138001	171.135	679.021	0.0201417	0.252032	Catechol-O-methyltransferase_domain-containing_protein_1
GSONMT00081185001	28.6761	113.783	0.00210953	0.252024	Cysteine_dioxygenase_type
GSONMT00063243001	3.50028	13.8895	0.0290463	0.252009	Uncharacterized_protein
GSONMT00071687001	10.331	41.0091	0.00210953	0.25192	Uncharacterized
GSONMT00021588001	1.12043	4.45619	0.00210953	0.251432	Uncharacterized
GSONMT00008488001	1.89363	7.54696	0.017454	0.250913	Uncharacterized_protein
GSONMT00036680001	0.415532	1.67136	0.01267	0.248619	Bone_morphogenetic_protein
GSONMT00065211001	0.581135	2.35394	0.0367644	0.246878	Uncharacterized
GSONMT00055837001	4.36706	17.7107	0.00210953	0.246577	COX_assembly_mitochondrial_protein_2
GSONMT00037444001	4.43636	18.0832	0.00210953	0.24533	Uncharacterized_protein
GSONMT00038654001	8.03856	32.8281	0.00210953	0.244868	Uncharacterized
GSONMT00033581001	8.80102	35.9445	0.00210953	0.24485	Annexin
GSONMT00003278001	3.71806	15.2211	0.00210953	0.24427	Uncharacterized
GSONMT00072180001	2.87541	11.8344	0.00380702	0.24297	Novel
GSONMT00077634001	0.539998	2.22626	0.017454	0.242558	Mitogen-activated_protein_kinase_kinase_kinase
GSONMT00039939001	8.30708	34.2507	0.00210953	0.242538	Uncharacterized_protein
GSONMT00063946001	0.891191	3.69721	0.01267	0.241044	Uncharacterized
GSONMT00081483001	5.65486	23.4678	0.00210953	0.240963	Glycosyltransferase_8_domain-containing_protein
GSONMT00001756001	1.10563	4.60588	0.00380702	0.240048	Matrix
GSONMT00024537001	0.782273	3.2664	0.0166267	0.239491	Uncharacterized
GSONMT00065431001	0.787334	3.28835	0.00210953	0.239431	6-phosphofructo-2-kinase/fructose-2,6-bisphosphatase
GSONMT00018215001	2.46507	10.3135	0.00210953	0.239014	Inositol-trisphosphate_3-kinase
GSONMT00075066001	1.43484	6.02086	0.00210953	0.238311	Formin-like_protein_2
GSONMT00075066001	1.11954	4.69823	0.00210953	0.23829	Formin-like_protein_2
GSONMT00029656001	0.604543	2.53803	0.0345722	0.238194	Uncharacterized
GSONMT00041055001	0.750005	3.15916	0.015681	0.237406	UPI00017601E8_related
GSONMT00073051001	0.675251	2.84761	0.00210953	0.237129	E3_ubiquitin-protein_ligase
GSONMT00008059001	1.48213	6.26071	0.00210953	0.236735	Uncharacterized_protein
GSONMT00030494001	0.664031	2.80645	0.00800839	0.236609	Alpha-(1,3)-fucosyltransferase
GSONMT00017797001	0.964431	4.08454	0.00210953	0.236117	Aldehyde
GSONMT00070826001	0.749109	3.1752	0.00800839	0.235925	Uncharacterized
GSONMT00002186001	0.383291	1.62654	0.0304813	0.235648	Lamina-associated_polypeptide_2_isoform_beta
GSONMT00075602001	29.5754	125.553	0.00210953	0.235561	Protein_phosphatase_1_regulatory_subunit
GSONMT00042510001	27.3598	116.172	0.00210953	0.235511	Chromosome_3_SCAF15037,_whole_genome_shotgun_sequence._(Fragment)
GSONMT00059677001	0.88719	3.76921	0.015681	0.235378	Chromosome_21_SCAF15029,_whole_genome_shotgun_sequence.
GSONMT00042394001	1.1249	4.78259	0.0201417	0.235207	UPI000224060D_related
GSONMT00030065001	1.47135	6.25962	0.00210953	0.235054	Growth_factor_receptor-bound_protein
GSONMT00030065001	3.19084	13.6361	0.00672588	0.233999	Growth_factor_receptor-bound_protein
GSONMT00029630001	1.33395	5.70572	0.0219475	0.233792	Uncharacterized_protein
GSONMT00008404001	128.445	551.634	0.00210953	0.232845	PREDICTED:_LOW_QUALITY_PROTEIN:_fatty_acid_desaturase_2
GSONMT00029279001	0.399828	1.73714	0.00380702	0.230165	Uncharacterized_protein
GSONMT00063585001	0.233114	1.01825	0.0282846	0.228936	Uncharacterized
GSONMT00001736001	0.440953	1.92637	0.0201417	0.228904	Uncharacterized_protein
GSONMT00051812001	0.689794	3.0316	0.00210953	0.227535	Glutamine_synthetase,
GSONMT00036316001	0.975101	4.30781	0.00210953	0.226357	Uncharacterized_protein_(Fragment)
GSONMT00064653001	0.515012	2.31921	0.00210953	0.222064	Uncharacterized_protein
GSONMT00000568001	2.36606	10.7101	0.00210953	0.220919	Ferric-chelate_reductase
GSONMT00076509001	0.745838	3.38616	0.00380702	0.220261	Tyrosine-protein_kinase
GSONMT00019726001	0.453606	2.06151	0.0345722	0.220036	Uncharacterized_protein
GSONMT00030631001	1.92816	8.81449	0.00210953	0.218749	Uncharacterized
GSONMT00009206001	3.09117	14.1465	0.0136609	0.218511	Uncharacterized_protein_(Fragment)
GSONMT00076655001	0.302232	1.394	0.00210953	0.216809	Uncharacterized_protein_(Fragment)
GSONMT00077635001	0.593074	2.75003	0.00210953	0.215661	Mitogen-activated_protein_kinase_kinase_kinase
GSONMT00030572001	0.793631	3.68016	0.00532933	0.215651	Uncharacterized_protein
GSONMT00000568001	1.48106	6.87872	0.00380702	0.21531	Ferric-chelate_reductase
GSONMT00000864001	0.586895	2.73165	0.00210953	0.21485	Uncharacterized_protein
GSONMT00064525001	0.302752	1.40954	0.00380702	0.214788	Uncharacterized
GSONMT00005681001	0.654502	3.05149	0.00532933	0.214486	F-box_only_protein
GSONMT00011090001	0.906836	4.23791	0.00800839	0.213982	Uncharacterized_protein
GSONMT00005717001	1.45373	6.85544	0.00210953	0.212055	Interferon-induced_guanylate-binding_protein
GSONMT00040535001	0.46854	2.21143	0.00532933	0.211872	Uncharacterized_protein_(Fragment)
GSONMT00034222001	16.8201	79.4032	0.00210953	0.211832	Cytosolic_sulfotransferase
GSONMT00012938001	0.906756	4.28927	0.00672588	0.211401	Uncharacterized
GSONMT00009645001	26.4011	125.13	0.00210953	0.210989
GSONMT00046385001	6.8248	32.3511	0.00210953	0.21096	Serine/threonine-protein_kinase/endoribonuclease
GSONMT00067470001	1.55143	7.39377	0.00210953	0.209829	Amyloid_beta_A4_protein-binding_family_A_member
GSONMT00029972001	0.534268	2.54669	0.0104049	0.209789	CDNA,_clone
GSONMT00070100001	0.613811	2.93375	0.00210953	0.209224	Uncharacterized_protein
GSONMT00029628001	1.93364	9.25059	0.00210953	0.209029	Uncharacterized_protein
GSONMT00064555001	0.294282	1.42252	0.0425255	0.206874	Polycomb_group_RING_finger_protein
GSONMT00015450001	7.08002	34.5794	0.00210953	0.204747	Uncharacterized
GSONMT00043861001	0.709925	3.4989	0.00919502	0.202899	Uncharacterized
GSONMT00073139001	0.704698	3.47454	0.00210953	0.202818	Gamma-glutamyl
GSONMT00080083001	0.599862	2.9643	0.0326894	0.202362	Uncharacterized_protein_(Fragment)
GSONMT00002331001	2.43562	12.1087	0.00210953	0.201146	Uncharacterized
GSONMT00054531001	2.85792	14.211	0.00210953	0.201106	Sodium-_and_chloride-dependent_glycine_transporter
GSONMT00064264001	0.786559	3.91507	0.00672588	0.200905	Uncharacterized
GSONMT00045215001	0.714658	3.57188	0.00210953	0.200079	Lysosomal-associated_transmembrane_protein
GSONMT00058030001	2.02183	10.1593	0.00210953	0.199013	Transmembrane_protein
GSONMT00064130001	3.40086	17.114	0.0104049	0.198718	Carbonic_anhydrase
GSONMT00059916001	2.00166	10.0816	0.0115562	0.198546	UPI000194EBA7_related
GSONMT00075113001	1.72273	8.67913	0.00210953	0.198491	Uncharacterized_protein
GSONMT00017832001	3.01482	15.309	0.00210953	0.196931	Immediate_early_response_gene_5
GSONMT00082489001	2.57229	13.0741	0.00800839	0.196747	Uncharacterized
GSONMT00072202001	0.487366	2.47908	0.00210953	0.196591	Interleukin-20_receptor_alpha
GSONMT00054052001	2.1903	11.1572	0.00210953	0.196313	Orphan_nuclear_receptor
GSONMT00002199001	0.609066	3.11482	0.00210953	0.195538	Uncharacterized_protein_(Fragment)
GSONMT00025821001	1.08798	5.57765	0.00210953	0.195061	Uncharacterized
GSONMT00032546001	10.2472	53.239	0.00210953	0.192475	Leucine-rich_repeat-containing_protein
GSONMT00067092001	1.04007	5.42269	0.00210953	0.1918	Uncharacterized_protein
GSONMT00013847001	0.979641	5.19049	0.01267	0.188738	Membrane_protein
GSONMT00011515001	0.991738	5.29228	0.00210953	0.187393	Uncharacterized_protein
GSONMT00078733001	0.820128	4.38347	0.00380702	0.187096	Tudor_domain-containing_protein
GSONMT00062349001	12.5396	67.1794	0.00210953	0.186658	StAR-related_lipid_transfer_protein
GSONMT00006422001	0.902934	4.85483	0.00210953	0.185987	UPI00022B2767_related
GSONMT00043207001	0.966558	5.20574	0.00210953	0.185672	Ceramide_synthase
GSONMT00024494001	1.36227	7.40092	0.0219475	0.184068	Ubiquitin_carboxyl-terminal_hydrolase
GSONMT00064131001	9.3745	50.9517	0.00210953	0.183988	Chromosome_5_SCAF14581,_whole_genome_shotgun_sequence._(Fragment)
GSONMT00030551001	7.77824	42.5985	0.00210953	0.182594	Uncharacterized_protein
GSONMT00011303001	0.59792	3.27769	0.00210953	0.182421	Uncharacterized_protein
GSONMT00079020001	1.93999	10.645	0.00210953	0.182244	Tolloid-like_protein
GSONMT00022838001	1.30851	7.18241	0.00210953	0.182183	Uncharacterized
GSONMT00021034001	3.10052	17.0282	0.00210953	0.182081	Heat_shock_70_kDa_protein_cognate_4
GSONMT00054446001	20.887	115.102	0.00210953	0.181465	Acetyl-CoA_acetyltransferase,_cytosolic
GSONMT00080459001	1.57942	8.71807	0.00210953	0.181166	Ornithine_decarboxylase
GSONMT00008378001	3.52554	19.6114	0.00210953	0.17977	Chromosome_8_SCAF15044,_whole_genome_shotgun_sequence._(Fragment)
GSONMT00054447001	26.0669	147.759	0.00210953	0.176415	Acetyl-CoA_acetyltransferase,_cytosolic
GSONMT00072714001	0.214949	1.2187	0.0345722	0.176376	Uncharacterized
GSONMT00038952001	3.56835	20.2495	0.00672588	0.176219	Novel_protein_(Zgc:153157)
GSONMT00053461001	0.993941	5.66903	0.00210953	0.175328	Uncharacterized
GSONMT00081385001	0.72672	4.18625	0.00380702	0.173597	28S_ribosomal_protein_S16,_mitochondrial
GSONMT00079602001	0.475023	2.74138	0.00210953	0.173279	Metalloproteinase_inhibitor
GSONMT00005007001	1.3153	7.62674	0.00210953	0.172459	Chromosome_5_SCAF14581,_whole_genome_shotgun_sequence
GSONMT00075797001	25.3243	147.119	0.00210953	0.172135	Probable_ergosterol_biosynthetic_protein
GSONMT00079019001	1.34931	7.84036	0.00210953	0.172098	Uncharacterized
GSONMT00070100001	0.775765	4.5085	0.015681	0.172067	Uncharacterized_protein
GSONMT00014841001	21.3738	124.235	0.00210953	0.172043	C-C_motif_chemokine_19
GSONMT00029920001	3.04299	17.8271	0.00210953	0.170695	Heat_shock_cognate_71_kDa
GSONMT00046903001	1.21235	7.12343	0.00210953	0.170192	Uncharacterized_protein
GSONMT00075750001	0.406057	2.38784	0.00380702	0.170052	Uncharacterized
GSONMT00008631001	0.958746	5.66237	0.00210953	0.169319	Mid1-interacting_protein
GSONMT00015227001	14.5239	85.899	0.00210953	0.169081	Estrogen
GSONMT00008795001	0.228243	1.35692	0.0378252	0.168207	Uncharacterized_protein
GSONMT00068900001	0.126139	0.751408	0.0298821	0.16787	Transcription_initiation_factor_TFIID_subunit
GSONMT00055642001	3.62653	22.1931	0.00210953	0.163408	Annexin
GSONMT00026172001	1.44346	8.90487	0.00210953	0.162098	Uncharacterized
GSONMT00030029001	0.478073	2.97318	0.0412822	0.160795	Uncharacterized
GSONMT00005366001	0.12582	0.788633	0.0260081	0.159542	Uncharacterized
GSONMT00014758001	0.311095	1.95973	0.00210953	0.158744	Uncharacterized_protein_n=1
GSONMT00063448001	3.25567	20.5738	0.00210953	0.158243	Uncharacterized_protein
GSONMT00076698001	8.97709	56.7501	0.00210953	0.158186	Uncharacterized
GSONMT00069444001	3.29783	20.8923	0.00919502	0.157849	Uncharacterized_protein
GSONMT00011513001	0.746845	4.73625	0.00210953	0.157687	Uncharacterized_protein
GSONMT00079846001	0.371908	2.37486	0.0183534	0.156602	Sodium-_and_chloride-dependent_glycine_transporter
GSONMT00056257001	69.4087	445.888	0.00210953	0.155664	Uncharacterized_protein
GSONMT00081253001	11.0211	71.0186	0.00210953	0.155186	Growth_arrest_and_DNA_damage-inducible_protein_GADD45
GSONMT00068975001	0.270169	1.74523	0.0115562	0.154804	Uncharacterized
GSONMT00054562001	35.6798	231.468	0.00210953	0.154146	Uncharacterized
GSONMT00010157001	0.460697	2.99199	0.00380702	0.153977	Uncharacterized
GSONMT00058235001	0.265887	1.72876	0.00210953	0.153802	Zinc_transporter
GSONMT00077847001	4.88499	31.7831	0.00210953	0.153698	Uncharacterized
GSONMT00081507001	0.401539	2.64105	0.044947	0.152038	Heat_shock_protein
GSONMT00071757001	1.03856	6.83972	0.00210953	0.151842	Uncharacterized_protein_(Fragment)_n=2
GSONMT00036919001	1.6718	11.0286	0.00919502	0.151588	Reverse_transcriptase-like
GSONMT00005549001	1.49365	9.99813	0.00800839	0.149393	Methylenetetrahydrofolate
GSONMT00031501001	140.119	946.201	0.00210953	0.148086
GSONMT00002539001	3.41317	23.0813	0.00210953	0.147876	Diphosphomevalonate
GSONMT00031778001	10.0564	68.0777	0.00210953	0.147719	Uncharacterized
GSONMT00040236001	0.260305	1.76606	0.00672588	0.147393	Latent_transforming_growth_factor_binding
GSONMT00015923001	1.40011	9.56281	0.00210953	0.146412	UPI0001760660_related
GSONMT00016157001	0.258336	1.76641	0.00800839	0.146249	Heparan_sulfate_glucosamine_3-O-sulfotransferase
GSONMT00078382001	0.536312	3.67687	0.0243948	0.145861	Uncharacterized
GSONMT00006421001	0.766573	5.27611	0.00210953	0.145291	UPI00022B2767_related
GSONMT00036317001	0.570434	3.95002	0.00210953	0.144413	Uncharacterized_protein_(Fragment)
GSONMT00045224001	0.62872	4.4129	0.0136609	0.142473	Uncharacterized
GSONMT00039822001	0.781685	5.63496	0.00210953	0.138721	Uncharacterized_protein
GSONMT00052294001	20.9485	151.452	0.00210953	0.138318	UPI000175F41C_related
GSONMT00016349001	13.4806	97.4783	0.00210953	0.138293	3-hydroxy-3-methylglutaryl-coenzyme_A
GSONMT00025281001	0.760065	5.50536	0.00210953	0.138059	Uncharacterized_protein
GSONMT00030206001	0.676489	4.99777	0.00210953	0.135358	Novel_protein_(Zgc:64011)
GSONMT00052134001	1.67234	12.3698	0.00210953	0.135195	Uncharacterized
GSONMT00071764001	3.6658	27.5128	0.00210953	0.13324	BAG_family_molecular_chaperone_regulator
GSONMT00041125001	2.82455	21.3277	0.00210953	0.132436	4F2_cell-surface_antigen_heavy
GSONMT00013021001	0.63493	4.80308	0.00672588	0.132192	Uncharacterized_protein
GSONMT00016350001	103.494	783.28	0.00210953	0.132129	3-hydroxy-3-methylglutaryl-coenzyme_A
GSONMT00039692001	0.307146	2.33321	0.0498317	0.131641	Uncharacterized_protein
GSONMT00068730001	0.936881	7.17954	0.00210953	0.130493	Chromosome_13_SCAF14715,_whole_genome_shotgun
GSONMT00032945001	0.343838	2.64588	0.0378252	0.129952	Matrix_metalloproteinase
GSONMT00015656001	9.04331	70.7866	0.00210953	0.127755	Uncharacterized
GSONMT00060934001	0.787926	6.21171	0.00210953	0.126845	Uncharacterized
GSONMT00024390001	5.64051	45.0991	0.00919502	0.125069	Chromosome_2_SCAF15004,_whole_genome_shotgun_sequence._(Fragment)
GSONMT00032768001	1.70011	13.8732	0.00210953	0.122546	Uncharacterized
GSONMT00068557001	0.215434	1.77534	0.00210953	0.121348	UPI000176158D_related
GSONMT00059516001	0.327426	2.69973	0.00919502	0.121281	Uncharacterized
GSONMT00070698001	0.280932	2.32345	0.00380702	0.120912	Sodium-dependent_multivitamin
GSONMT00013369001	0.414717	3.57401	0.0488613	0.116037	KDEL_motif-containing_protein
GSONMT00081292001	7.16597	62.1965	0.00210953	0.115215	Uncharacterized_protein
GSONMT00075232001	1.46647	12.9286	0.00210953	0.113428	Uncharacterized
GSONMT00005548001	1.02166	9.08778	0.00210953	0.112421	Methylenetetrahydrofolate
GSONMT00070501001	2.04906	18.2904	0.00210953	0.112029	Growth_hormone_receptor_isoform
GSONMT00023605001	0.195961	1.75971	0.0219475	0.11136	Uncharacterized_protein_(Fragment)
GSONMT00016199001	3.43223	30.9264	0.00210953	0.110981	Choline/ethanolaminephosphotransferase
GSONMT00053648001	0.428297	3.92519	0.00210953	0.109115	Isoform_C_of
GSONMT00020438001	5.2538	48.1521	0.00210953	0.109108	Serpin
GSONMT00080497001	0.600523	5.53045	0.00210953	0.108585	Uncharacterized
GSONMT00039722001	0.588917	5.5351	0.0431353	0.106397	Uncharacterized_protein
GSONMT00033435001	1.09613	10.4245	0.00210953	0.105149	Neural_proliferation_differentiation_and_control_protein_1
GSONMT00025825001	0.733891	7.01587	0.0235501	0.104604	Uncharacterized
GSONMT00069445001	1.87015	17.8904	0.00210953	0.104534	Uncharacterized_protein
GSONMT00081484001	4.46836	42.8751	0.00210953	0.104218	Uncharacterized_protein
GSONMT00006280001	2.674	26.201	0.00210953	0.102057	Uncharacterized_protein
GSONMT00046351001	0.199556	1.97627	0.00210953	0.100976	Uncharacterized_protein
GSONMT00056606001	4.18682	41.9257	0.00210953	0.0998629	UPI00022B15F1_related
GSONMT00063524001	2.47383	24.8113	0.00210953	0.0997058	Cyclin-dependent_kinases_regulatory_subunit
GSONMT00074922001	0.426065	4.4994	0.00210953	0.0946937	Uncharacterized
GSONMT00007610001	6.61844	69.9103	0.00210953	0.0946705	HIG1_domain_family_member
GSONMT00009585001	1.5882	16.9304	0.00210953	0.0938076	Chromosome_19_SCAF14664,_whole_genome_shotgun
GSONMT00000024001	1.0517	11.3212	0.00210953	0.0928965	Growth_differentiation_factor
GSONMT00064410001	14.0901	153.807	0.00210953	0.091609	Isopentenyl-diphosphate_Delta-isomerase
GSONMT00037871001	24.3223	265.749	0.00210953	0.0915236
GSONMT00081674001	0.378737	4.27532	0.00210953	0.0885868	Uncharacterized
GSONMT00067291001	0.494904	5.62089	0.00210953	0.0880473	Uncharacterized
GSONMT00000681001	4.67187	54.3848	0.00210953	0.085904	Protein
GSONMT00010144001	12.4614	147.393	0.00210953	0.0845454
GSONMT00042149001	0.283271	3.39393	0.0210917	0.083464	Uncharacterized
GSONMT00064123001	0.623111	7.46791	0.00210953	0.0834385	High_choriolytic_enzyme
GSONMT00058101001	13.933	168.933	0.00210953	0.0824765	Novel
GSONMT00035855001	0.117222	1.46592	0.0210917	0.0799648	Uncharacterized_protein
GSONMT00079100001	0.260547	3.29698	0.015681	0.079026	Phosphoserine
GSONMT00052214001	9.28002	118.118	0.00210953	0.0785657	Chromosome_8_SCAF15044,_whole_genome_shotgun_sequence._(Fragment)
GSONMT00080720001	10.2606	130.606	0.00210953	0.0785615	Uncharacterized_protein
GSONMT00011302001	2.08322	26.6716	0.00210953	0.0781063	Uncharacterized_protein_(Fragment)
GSONMT00077046001	0.901221	11.54	0.00210953	0.0780954	LOC495385
GSONMT00012047001	0.20967	2.68571	0.00210953	0.0780687	Igfbp5b
GSONMT00072320001	3.16235	41.1158	0.00210953	0.0769133	Growth_factor_receptor-bound_protein
GSONMT00065279001	0.216542	2.84584	0.0267359	0.0760907	Uncharacterized
GSONMT00042046001	3.9848	54.0333	0.00210953	0.0737471	UPI00022B4768_related
GSONMT00031182001	3.54966	48.899	0.00210953	0.0725917	Uncharacterized
GSONMT00072320001	3.18002	46.1715	0.00210953	0.0688741	Growth_factor_receptor-bound_protein
GSONMT00040185001	0.202092	2.95007	0.00210953	0.0685041	Uncharacterized_protein
GSONMT00055672001	0.446781	6.57919	0.0146934	0.0679082	Gonadal-soma_derived_growth_factor
GSONMT00078003001	0.418548	6.23076	0.00210953	0.0671745	Fish_sorting_nexin_from
GSONMT00044416001	6.77019	103.501	0.00210953	0.0654118	Uncharacterized
GSONMT00076043001	0.607138	9.41778	0.00210953	0.0644672	UPI00022AF590_related
GSONMT00060552001	0.254589	3.96376	0.0378252	0.0642292	Uncharacterized_protein
GSONMT00039624001	5.16817	81.3942	0.00210953	0.0634956	7-dehydrocholesterol_reductase
GSONMT00045963001	13.4213	211.569	0.0290463	0.063437	Microfibril-associated_glycoprotein
GSONMT00003231001	108.524	1720.31	0.00532933	0.063084	Uncharacterized
GSONMT00002204001	0.452507	7.32745	0.00210953	0.061755	Uncharacterized
GSONMT00037574001	0.373708	6.10777	0.00210953	0.0611857	Pol-like_protein
GSONMT00074153001	0.965887	16.1043	0.00210953	0.059977	Ribonuclease_P_protein_subunit
GSONMT00055463001	0.0757442	1.26547	0.0290463	0.0598546	Uncharacterized
GSONMT00010243001	9.23386	159.285	0.00210953	0.0579707	Hydroxymethylglutaryl-CoA_synthase,
GSONMT00056607001	0.312657	5.409	0.00210953	0.0578031	Uncharacterized_protein
GSONMT00013107001	0.448337	7.76704	0.0298821	0.057723	Chromosome_9_SCAF14710,_whole_genome_shotgun_sequence.
GSONMT00001161001	2.89999	53.4169	0.00210953	0.0542897	Chromosome_8_SCAF15119,_whole_genome_shotgun_sequence._(Fragment)
GSONMT00017723001	1.12124	21.1245	0.015681	0.0530777	Uncharacterized
GSONMT00071605001	0.195591	3.70037	0.0115562	0.0528571	Sub-family_B_ATP-binding_cassette_transporter
GSONMT00065056001	0.178139	3.38809	0.00380702	0.052578	BAG_family_molecular_chaperone_regulator
GSONMT00065671001	0.904785	17.2274	0.00210953	0.0525201	Novel_protein_similar_to_vertebrate_farnesyl-diphosphate_farnesyltransferase_1_(FDFT1)_(Fragment)
GSONMT00072668001	2.25586	42.9944	0.00210953	0.0524687	Myelin-associated_glycoprotein
GSONMT00007762001	11.1397	217.441	0.00210953	0.0512309	7-dehydrocholesterol_reductase_medium
GSONMT00016297001	7.27016	142.491	0.00210953	0.0510219	Hydroxymethylglutaryl-CoA_synthase,
GSONMT00066291001	0.124222	2.73278	0.0136609	0.0454563	Calcium/calmodulin-dependent_3',5'-cyclic_nucleotide_phosphodiesterase
GSONMT00065670001	1.57809	35.6066	0.00210953	0.0443202	Squalene
GSONMT00037147001	0.530886	12.3437	0.00210953	0.0430087	Uncharacterized
GSONMT00075126001	1.8813	45.6086	0.00210953	0.0412488	Uncharacterized_protein
GSONMT00078174001	0.653565	16.0464	0.00210953	0.0407297	Cyclic_AMP-dependent_transcription_factor
GSONMT00068726001	0.372917	9.22492	0.0298821	0.040425	Uncharacterized_protein
GSONMT00080250001	0.109146	2.74763	0.0378252	0.0397237	Taxilin_beta_muscle-derived_protein_77-like_(Fragment)
GSONMT00039961001	1.36583	34.9601	0.00210953	0.0390683	Nonclassical_MHC_class_I_antigen
GSONMT00082379001	12.5812	343.784	0.00210953	0.0365962
GSONMT00069520001	2.81411	77.5835	0.00210953	0.036272	Lamin-B
GSONMT00002754001	2.67502	77.7749	0.00210953	0.0343944	Testosterone_17-beta-dehydrogenase_3
GSONMT00063657001	1.64552	56.8176	0.00210953	0.0289614	Uncharacterized
GSONMT00051800001	0.157335	5.47142	0.00919502	0.0287558	Uncharacterized
GSONMT00025606001	2.98634	106.384	0.00210953	0.0280713	Uncharacterized
GSONMT00025822001	2.16674	82.7048	0.00210953	0.0261985	Uncharacterized
GSONMT00066913001	61.4966	2397.13	0.00210953	0.0256543	Vitellogenin
GSONMT00010627001	1.14447	44.9789	0.00210953	0.0254446	Uncharacterized
GSONMT00049350001	0.317591	13.5035	0.00210953	0.0235192	Uncharacterized
GSONMT00013855001	3.4875	153.264	0.00210953	0.0227549	Toll-like_leucine-rich_repeat
GSONMT00024746001	1.02422	49.3713	0.00210953	0.0207453	Uncharacterized
GSONMT00030194001	0.0794062	4.12852	0.015681	0.0192336	UPI00022B419B_related
GSONMT00063829001	0.184496	9.70408	0.00210953	0.0190122	Uncharacterized_protein_(Fragment)
GSONMT00030677001	1.53688	84.6443	0.00210953	0.0181569	Uncharacterized_protein
GSONMT00054590001	0.128952	7.91748	0.015681	0.016287	Diphosphomevalonate
GSONMT00025823001	0.534098	36.9773	0.00210953	0.0144439	Uncharacterized
GSONMT00069605001	1.22854	90.1791	0.00210953	0.0136233	Uncharacterized_protein
GSONMT00033781001	2.60081	236.781	0.00210953	0.010984	Uncharacterized
GSONMT00032099001	0.727065	76.9512	0.00210953	0.00944839	Uncharacterized
GSONMT00003321001	1.52337	203.928	0.00210953	0.00747014	Tissue_factor_pathway_inhibitor
GSONMT00007149001	66.6273	8997.72	0.00210953	0.00740491	Vitelline_envelope_protein
GSONMT00058917001	0.179806	25.0217	0.00210953	0.007186	Cystine/glutamate
GSONMT00044932001	89.1878	12690.4	0.00210953	0.00702797	Chromosome_undetermined_SCAF7261,_whole_genome_shotgun_sequence.
GSONMT00001308001	0.267837	39.86	0.0385678	0.00671944	Mhc1uxa2_protein
GSONMT00079496001	1.31829	1859.49	0.00210953	0.000708952	Uncharacterized_protein
GSONMT00003750001	0	0.844864	0.00210953	0	UPI00022B15A6_related
GSONMT00005363001	0	5.39057	0.00210953	0	Uncharacterized_protein
GSONMT00012692001	0	2.05688	0.00800839	0	Guanine_nucleotide-binding_protein_G(i)_subunit
GSONMT00012711001	0	1.65733	0.00210953	0	Uncharacterized
GSONMT00014824001	0	5.55641	0.0104049	0	PREDICTED:_battenin
GSONMT00016590001	0	0.89662	0.00210953	0	Sodium_channel_protein_type_8_subunit
GSONMT00017003001	0	5.80956	0.00210953	0	Calcium/calmodulin-dependent_3',5'-cyclic_nucleotide_phosphodiesterase
GSONMT00018558001	0	4.39098	0.00380702	0	A_disintegrin_and_metalloproteinase_with_thrombospondin_motifs
GSONMT00019436001	0	1.5784	0.0219475	0	Uncharacterized
GSONMT00020397001	0	1.21729	0.00210953	0	Serine/threonine-protein_kinase
GSONMT00020397001	0	1.37072	0.00210953	0	Serine/threonine-protein_kinase
GSONMT00020397001	0	0.921174	0.00210953	0	Serine/threonine-protein_kinase
GSONMT00021774001	0	1.4582	0.00210953	0	Uncharacterized_protein_(Fragment)
GSONMT00023643001	0	0.831729	0.00210953	0	Uncharacterized_protein
GSONMT00025340001	0	1.76633	0.00210953	0	Anionic
GSONMT00027918001	0	19.5156	0.00210953	0
GSONMT00027918001	0	2.03261	0.00210953	0
GSONMT00027918001	0	15.117	0.00210953	0
GSONMT00027918001	0	3.40651	0.00210953	0
GSONMT00027919001	0	32.6253	0.00210953	0
GSONMT00028043001	0	0.747305	0.00800839	0	Chromosome_undetermined_SCAF14546,_whole_genome_shotgun
GSONMT00029029001	0	8.3888	0.0219475	0	UPF0728_protein_C10orf53
GSONMT00030194001	0	5.20973	0.00210953	0	UPI00022B419B_related
GSONMT00034139001	0	1.137	0.0275077	0	Probable_phospholipid-transporting_ATPase
GSONMT00035713001	0	13.4278	0.0243948	0	Zgc:112970
GSONMT00035811001	0	0.975965	0.00210953	0	Uncharacterized
GSONMT00035811001	0	1.31066	0.00210953	0	Uncharacterized
GSONMT00036595001	0	0.865852	0.00210953	0	Uncharacterized
GSONMT00037080001	0	87.5413	0.00210953	0	UPI00022B4C78_related
GSONMT00037645001	0	1.60298	0.00210953	0	Nasal_embryonic_LHRH
GSONMT00040013001	0	1.05355	0.0345722	0	UPI0002026E79_related_cluster
GSONMT00040628001	0	0.841001	0.00210953	0	Acyl-CoA_dehydrogenase_family_member_11
GSONMT00041255001	0	0.681726	0.00210953	0
GSONMT00041255001	0	1.93518	0.00210953	0
GSONMT00041591001	0	9.80766	0.00210953	0	Estrogen
GSONMT00042203001	0	6.26847	0.00210953	0	Guanine_nucleotide-binding_protein_subunit
GSONMT00043281001	0	2.50965	0.00210953	0	Uncharacterized
GSONMT00043374001	0	76.816	0.00210953	0	Uncharacterized_protein_(Fragment)
GSONMT00047656001	0	0.951501	0.00210953	0	Chromosome_undetermined_SCAF13842,_whole_genome_shotgun_sequence._(Fragment)
GSONMT00048483001	0	12.9114	0.00210953	0
GSONMT00048729001	0	0.682579	0.0326894	0	Uncharacterized
GSONMT00050001001	0	3.35613	0.00210953	0	Uncharacterized
GSONMT00050912001	0	2.13019	0.015681	0	Chromosome_16_SCAF14974,_whole_genome_shotgun
GSONMT00052326001	0	42.7643	0.0275077	0
GSONMT00053487001	0	8.33564	0.00210953	0	Uncharacterized
GSONMT00056367001	0	0.898799	0.00210953	0
GSONMT00057261001	0	1.44304	0.01267	0	Sister_chromatid_cohesion_protein
GSONMT00059217001	0	0.756058	0.00210953	0	Uncharacterized_protein
GSONMT00059217001	0	0.770745	0.00210953	0	Uncharacterized_protein
GSONMT00060185001	0	1.732	0.0219475	0	Uncharacterized
GSONMT00061388001	0	4.14031	0.00210953	0	Uncharacterized
GSONMT00063289001	0	1.77978	0.00210953	0
GSONMT00063526001	0	70.4989	0.00210953	0	Uncharacterized
GSONMT00065571001	0	2.23651	0.00210953	0	Uncharacterized
GSONMT00066734001	0	1.53807	0.00210953	0	Novel
GSONMT00068099001	0	406.535	0.00210953	0	Uncharacterized_protein
GSONMT00069453001	0	1.3248	0.00210953	0	Sodium_channel_protein_type_4_subunit_alpha
GSONMT00070411001	0	9.14907	0.0472534	0	Uncharacterized
GSONMT00070754001	0	2.44892	0.01267	0	Si:dkey-14d8.20
GSONMT00071408001	0	0.920051	0.00210953	0
GSONMT00071684001	0	0.909786	0.00210953	0	Uncharacterized
GSONMT00072262001	0	2.65098	0.00210953	0	Orphan_nuclear_receptor
GSONMT00072967001	0	2.29196	0.00210953	0	Uncharacterized_protein
GSONMT00072967001	0	2.45022	0.00210953	0	Uncharacterized_protein
GSONMT00073416001	0	0.720694	0.00210953	0	UPI00005478BF_related
GSONMT00076665001	0	2.14596	0.0227047	0	Uncharacterized_protein
GSONMT00077102001	0	1.02176	0.00210953	0	Uncharacterized_protein
GSONMT00077830001	0	0.859988	0.00210953	0	Uncharacterized
GSONMT00080433001	0	3.70815	0.00210953	0	Uncharacterized_protein_(Fragment)
GSONMT00000245001	0.974535	0	0.00210953		Sodium/potassium-transporting_ATPase_subunit
GSONMT00000573001	13.0752	0	0.00210953		Uncharacterized_protein
GSONMT00001410001	1.40778	0	0.00210953		UPI00022AF92F_related
GSONMT00001710001	6.51431	0	0.00210953		Carboxypeptidase
GSONMT00002376001	2.03339	0	0.00210953		UPI00022AFAFE_related
GSONMT00003747001	1.69573	0	0.00210953		Uncharacterized_protein_(Fragment)
GSONMT00003771001	11.3436	0	0.00210953		Sodium-driven_chloride_bicarbonate
GSONMT00004410001	0.827482	0	0.00210953		PIT54_(Fragment)
GSONMT00006358001	3.61392	0	0.00210953		Chymotrypsin-like_elastase_family_member
GSONMT00006358001	8.17244	0	0.00800839		Chymotrypsin-like_elastase_family_member
GSONMT00007676001	1.36644	0	0.00210953		Unique_cartilage_matrix-associated
GSONMT00007677001	1.11546	0	0.00210953		UPI000223E99E_related
GSONMT00008253001	8.07691	0	0.0104049		Uncharacterized
GSONMT00010197001	2.84902	0	0.00210953
GSONMT00010995001	0.765039	0	0.0115562		UPI0000EBDAB8_related
GSONMT00011726001	2.66201	0	0.00210953		Uncharacterized
GSONMT00014530001	1.41106	0	0.00532933		Uncharacterized
GSONMT00014530001	0.990556	0	0.00210953		Uncharacterized
GSONMT00014808001	0.885682	0	0.00210953		Uncharacterized
GSONMT00016138001	1.56779	0	0.00210953		Uncharacterized
GSONMT00017970001	1.31222	0	0.00210953		Uncharacterized_protein_(Fragment)
GSONMT00018713001	0.828665	0	0.0311542		Uncharacterized_protein
GSONMT00019631001	388.319	0	0.00210953		CD209_antigen-like_protein_A
GSONMT00020042001	19.7033	0	0.00210953
GSONMT00022007001	0.890117	0	0.00210953		Complement_C1q-like_protein_2
GSONMT00023984001	0.714115	0	0.0227047		Uncharacterized
GSONMT00025919001	1.57963	0	0.00210953		Uncharacterized_protein_(Fragment)
GSONMT00026998001	1.90531	0	0.0326894		Uncharacterized_protein
GSONMT00027986001	1.96254	0	0.00210953		Tyrosine-protein
GSONMT00028863001	0.78092	0	0.0104049		Uncharacterized
GSONMT00028925001	1.47314	0	0.00210953		CD200_(Fragment)
GSONMT00030560001	11.3703	0	0.00210953		Uncharacterized
GSONMT00030666001	1.1678	0	0.00532933		Chromosome_2_SCAF14781,_whole_genome_shotgun
GSONMT00031252001	0.718132	0	0.00210953		Anterior_gradient_protein_2
GSONMT00031775001	7.24802	0	0.00210953		Proproteinase_E
GSONMT00032320001	1.04346	0	0.0166267		Uncharacterized_protein
GSONMT00032320001	1.99649	0	0.00210953		Uncharacterized_protein
GSONMT00032904001	1.67343	0	0.0275077		Spermatid_perinuclear_RNA-binding
GSONMT00033986001	2.04781	0	0.00380702		Chromosome_undetermined_SCAF9787,_whole_genome_shotgun_sequence.
GSONMT00035606001	0.646742	0	0.00210953		Guanine_nucleotide-binding_protein_G(I)/G(S)/G(O)_subunit
GSONMT00035751001	1.34219	0	0.00210953		Ankyrin_repeat_and_death_domain-containing_protein
GSONMT00039557001	335.574	0	0.00210953		Trypsinogen_H2_3a4
GSONMT00040274001	0.931754	0	0.0104049		Sodium-dependent_neutral_amino_acid_transporter
GSONMT00040291001	0.821463	0	0.00210953		Carbonic_anhydrase-related
GSONMT00040610001	0.730267	0	0.0483514		Uncharacterized
GSONMT00040702001	1.48677	0	0.0345722		Uncharacterized_protein_(Fragment)
GSONMT00040707001	1.05788	0	0.00532933		Uncharacterized_protein
GSONMT00041977001	3.25467	0	0.00210953		Uncharacterized_protein
GSONMT00043777001	1.57899	0	0.00210953		CD200_(Fragment)
GSONMT00043806001	0.653297	0	0.00210953		Uncharacterized
GSONMT00044804001	1.28212	0	0.00210953		Chromosome_17_SCAF14747,_whole_genome_shotgun
GSONMT00045352001	1.1134	0	0.0251808		Transmembrane_protein
GSONMT00045777001	1.10944	0	0.00800839		Dihydropyrimidinase-like
GSONMT00048157001	0.759339	0	0.00210953		Ubiquitin_carboxyl-terminal_hydrolase
GSONMT00049142001	1.36074	0	0.00210953		Chromosome_12_SCAF15007,_whole_genome_shotgun_sequence._(Fragment)
GSONMT00050143001	0.728022	0	0.00210953		Transmembrane_and_TPR_repeat-containing_protein
GSONMT00051641001	0.762844	0	0.00672588
GSONMT00051756001	162.651	0	0.00210953		Vitelline_membrane_outer_layer_protein_1
GSONMT00052224001	1.01589	0	0.00210953		cAMP-specific_3',5'-cyclic_phosphodiesterase
GSONMT00053379001	0.922843	0	0.00210953		CD80/86_molecule_membrane-bound_form
GSONMT00055795001	0.905148	0	0.00210953		Uncharacterized_protein
GSONMT00057917001	2.63922	0	0.00210953		UPI00023ACC59_related
GSONMT00058305001	1.00076	0	0.044947		Uncharacterized_protein
GSONMT00059215001	4.16492	0	0.00210953		Uncharacterized_protein
GSONMT00061149001	1.80474	0	0.00210953		Chromosome_9_SCAF14729,_whole_genome_shotgun
GSONMT00062167001	0.880804	0	0.00210953		Chromosome_undetermined_SCAF7054,_whole_genome_shotgun
GSONMT00062319001	0.94278	0	0.00210953		Uncharacterized_protein
GSONMT00065166001	1.56003	0	0.00210953		Uncharacterized
GSONMT00065649001	0.688154	0	0.00210953		Zinc_finger_protein
GSONMT00065777001	0.773789	0	0.00210953		Glycine_receptor_alpha_4b_subunit_(Fragment)
GSONMT00066448001	0.713715	0	0.00210953		Uncharacterized_protein
GSONMT00068118001	42.3724	0	0.00210953		Ammonium_transporter_Rh_type
GSONMT00070546001	0.932056	0	0.015681		Uncharacterized
GSONMT00070808001	1.03125	0	0.00210953		Uncharacterized
GSONMT00073598001	4.17241	0	0.00210953		Chromosome_4_SCAF14624,_whole_genome_shotgun
GSONMT00073599001	3.6289	0	0.00210953		Uncharacterized
GSONMT00076955001	4.4364	0	0.00210953		Chymotrypsin-like_elastase_family_member
GSONMT00077170001	1.07319	0	0.00919502		Uncharacterized_protein
GSONMT00077697001	2.45918	0	0.00210953		Vesicle-fusing
GSONMT00077713001	0.76176	0	0.0104049		Uncharacterized_protein_(Fragment)
GSONMT00078596001	0.880783	0	0.00210953		Uncharacterized_protein
GSONMT00079074001	0.882122	0	0.00210953		Putative_uncharacterized_protein_(Fragment)
GSONMT00079419001	1.0568	0	0.00210953		Uncharacterized
GSONMT00079985001	1.19198	0	0.0472534		Uncharacterized
GSONMT00080760001	4.12096	0	0.0367644		Uncharacterized
GSONMT00080780001	1.13227	0	0.00210953		Astacin_like
GSONMT00080881001	2.66234	0	0.00210953		Serine/threonine-protein_kinase_MRCK
GSONMT00081273001	0.673713	0	0.00210953		TC1-like
GSONMT00081959001	0.656242	0	0.015681		A_disintegrin_and_metalloproteinase_with_thrombospondin_motifs
GSONMT00082669001	8.10898	0	0.00210953		Uncharacterized
GSONMT00082688001	0.726105	0	0.00210953		Uncharacterized_protein
