# Supplementary material for: Transcriptome Analyses Reveal Lipid Metabolic Process in Liver Related to the Difference of Carcass Fat Content in Rainbow Trout (Oncorhynchus mykiss)
Source: Int J Genomics. 2016 Aug 29;2016:7281585. doi: 10.1155/2016/7281585 (PMC5019904; doi:10.1155/2016/7281585)
Supplement: Supplementary file 1 — The detailed information about the 1,694 differentially expressed transcripts identified from liver tissue between the high and low carcass fat content fish were shown in the Supplementary Materials, including standard nomenclature, expression and gene annotation provided by the Trout Genome dataset and the GO enrichment results by using the topGO package. [file 7281585.f1.zip › Figures_and_Supplementary Tables/Supplementary Tables/TableS2_revised.xlsx]

## Sheet: Sheet1
>Biological Process
	GO.ID	GO annotation	Term Annotated	Significant	Expected	Classic Fisher p value
1	GO:0044710	single-organism metabolic process	2415	255	159.84	7.7e-17
2	GO:1901605	alpha-amino acid metabolic process	129	38	8.54	1.4e-15
3	GO:0055114	oxidation-reduction process	767	109	50.76	6.2e-15
4	GO:0006520	cellular amino acid metabolic process	255	52	16.88	1.6e-13
5	GO:0006082	organic acid metabolic process	332	60	21.97	5.6e-13
6	GO:0019752	carboxylic acid metabolic process	332	60	21.97	5.6e-13
7	GO:0043436	oxoacid metabolic process	332	60	21.97	5.6e-13
8	GO:0015669	gas transport	25	14	1.65	6.2e-11
9	GO:0015671	oxygen transport	25	14	1.65	6.2e-11
10	GO:0006720	isoprenoid metabolic process	15	9	0.99	8.1e-08
11	GO:0008299	isoprenoid biosynthetic process	15	9	0.99	8.1e-08
12	GO:0006629	lipid metabolic process	372	52	24.62	2e-07
13	GO:0044699	single-organism process	6803	514	450.26	6.5e-07
14	GO:0006006	glucose metabolic process	88	20	5.82	8.6e-07
15	GO:0019318	hexose metabolic process	122	24	8.07	1.2e-06
16	GO:0005996	monosaccharide metabolic process	126	24	8.34	2.2e-06
17	GO:0006541	glutamine metabolic process	26	10	1.72	3.1e-06
18	GO:0009064	glutamine family amino acid metabolic pr...	44	13	2.91	3.2e-06
19	GO:1901564	organonitrogen compound metabolic proces...	981	100	64.93	6.2e-06
20	GO:0008610	lipid biosynthetic process	108	21	7.15	6.6e-06
21	GO:0009069	serine family amino acid metabolic proce...	28	10	1.85	6.7e-06
22	GO:0044711	single-organism biosynthetic process	498	59	32.96	8e-06
23	GO:0044283	small molecule biosynthetic process	132	23	8.74	1.6e-05
24	GO:0009063	cellular amino acid catabolic process	39	11	2.58	3e-05
25	GO:0006007	glucose catabolic process	69	15	4.57	3.5e-05
26	GO:0019320	hexose catabolic process	69	15	4.57	3.5e-05
27	GO:0046365	monosaccharide catabolic process	69	15	4.57	3.5e-05
28	GO:0008652	cellular amino acid biosynthetic process	86	17	5.69	4e-05
29	GO:0016052	carbohydrate catabolic process	70	15	4.63	4.2e-05
30	GO:0044724	single-organism carbohydrate catabolic p...	70	15	4.63	4.2e-05
31	GO:1901606	alpha-amino acid catabolic process	34	10	2.25	4.6e-05
32	GO:0016053	organic acid biosynthetic process	115	20	7.61	5.9e-05
33	GO:0046394	carboxylic acid biosynthetic process	115	20	7.61	5.9e-05
34	GO:0044281	small molecule metabolic process	1103	105	73	6.7e-05
35	GO:0006096	glycolysis	60	13	3.97	0.00012
36	GO:0016054	organic acid catabolic process	45	11	2.98	0.00013
37	GO:0046395	carboxylic acid catabolic process	45	11	2.98	0.00013
38	GO:1901607	alpha-amino acid biosynthetic process	69	14	4.57	0.00014
39	GO:0044282	small molecule catabolic process	47	11	3.11	0.00019
40	GO:0006544	glycine metabolic process	16	6	1.06	0.00037
41	GO:0006555	methionine metabolic process	7	4	0.46	0.00057
42	GO:0008152	metabolic process	6792	492	449.53	0.0007
43	GO:0000096	sulfur amino acid metabolic process	13	5	0.86	0.00103
44	GO:0044723	single-organism carbohydrate metabolic p...	306	35	20.25	0.00106
45	GO:0006542	glutamine biosynthetic process	4	3	0.26	0.0011
46	GO:0015889	cobalamin transport	4	3	0.26	0.0011
47	GO:0046654	tetrahydrofolate biosynthetic process	4	3	0.26	0.0011
48	GO:0051180	vitamin transport	4	3	0.26	0.0011
49	GO:0006575	cellular modified amino acid metabolic p...	50	10	3.31	0.00139
50	GO:0006094	gluconeogenesis	14	5	0.93	0.00152
51	GO:0006518	peptide metabolic process	14	5	0.93	0.00152
52	GO:0009074	aromatic amino acid family catabolic pro...	9	4	0.6	0.00183
53	GO:0009308	amine metabolic process	21	6	1.39	0.00189
54	GO:0005975	carbohydrate metabolic process	468	47	30.97	0.00265
55	GO:0044765	single-organism transport	1304	111	86.31	0.00275
56	GO:0006563	L-serine metabolic process	10	4	0.66	0.0029
57	GO:0019882	antigen processing and presentation	38	8	2.52	0.00294
58	GO:0044255	cellular lipid metabolic process	221	26	14.63	0.00302
59	GO:0009072	aromatic amino acid family metabolic pro...	17	5	1.13	0.00397
60	GO:0019319	hexose biosynthetic process	17	5	1.13	0.00397
61	GO:0046364	monosaccharide biosynthetic process	17	5	1.13	0.00397
62	GO:0006546	glycine catabolic process	11	4	0.73	0.00432
63	GO:0009071	serine family amino acid catabolic proce...	11	4	0.73	0.00432
64	GO:0005984	disaccharide metabolic process	2	2	0.13	0.00438
65	GO:0005991	trehalose metabolic process	2	2	0.13	0.00438
66	GO:0006021	inositol biosynthetic process	2	2	0.13	0.00438
67	GO:0030111	regulation of Wnt signaling pathway	2	2	0.13	0.00438
68	GO:0030178	negative regulation of Wnt signaling pat...	2	2	0.13	0.00438
69	GO:0046173	polyol biosynthetic process	2	2	0.13	0.00438
70	GO:0046653	tetrahydrofolate metabolic process	6	3	0.4	0.00496
71	GO:0006576	cellular biogenic amine metabolic proces...	18	5	1.19	0.0052
72	GO:0009084	glutamine family amino acid biosynthetic...	18	5	1.19	0.0052
73	GO:0009396	folic acid-containing compound biosynthe...	18	5	1.19	0.0052
74	GO:0044106	cellular amine metabolic process	18	5	1.19	0.0052
75	GO:0042398	cellular modified amino acid biosyntheti...	42	8	2.78	0.00561
76	GO:0006790	sulfur compound metabolic process	34	7	2.25	0.00604
77	GO:0051186	cofactor metabolic process	122	16	8.07	0.00653
78	GO:0008202	steroid metabolic process	19	5	1.26	0.00668
79	GO:1901566	organonitrogen compound biosynthetic pro...	331	34	21.91	0.00699
80	GO:0016051	carbohydrate biosynthetic process	53	9	3.51	0.00743
81	GO:0009066	aspartate family amino acid metabolic pr...	13	4	0.86	0.00841
82	GO:0006760	folic acid-containing compound metabolic...	20	5	1.32	0.00844
83	GO:0043603	cellular amide metabolic process	20	5	1.32	0.00844
84	GO:0071705	nitrogen compound transport	46	8	3.04	0.00982
>Molecular Function
	GO.ID	GO annotation	Term Annotated	Significant	Expected	Classic Fisher p value
1	GO:0016491	oxidoreductase activity	740	109	38.59	3.3e-23
2	GO:0003824	catalytic activity	6753	493	352.18	4e-20
3	GO:0005506	iron ion binding	219	45	11.42	1.7e-15
4	GO:0046906	tetrapyrrole binding	161	37	8.4	1.4e-14
5	GO:0020037	heme binding	156	34	8.14	8.1e-13
6	GO:0019825	oxygen binding	25	14	1.3	2.6e-12
7	GO:0048037	cofactor binding	309	43	16.11	4.3e-09
8	GO:0004623	phospholipase A2 activity	10	6	0.52	3.5e-06
9	GO:0050662	coenzyme binding	203	27	10.59	7.5e-06
10	GO:0052689	carboxylic ester hydrolase activity	35	10	1.83	7.9e-06
11	GO:0016614	oxidoreductase activity, acting on CH-OH...	79	15	4.12	1.2e-05
12	GO:0004497	monooxygenase activity	30	9	1.56	1.5e-05
13	GO:0005215	transporter activity	1062	87	55.38	1.9e-05
14	GO:0016829	lyase activity	158	22	8.24	2.5e-05
15	GO:0008233	peptidase activity	684	60	35.67	5.8e-05
16	GO:0022892	substrate-specific transporter activity	853	70	44.49	0.00012
17	GO:0004645	phosphorylase activity	11	5	0.57	0.00014
18	GO:0004489	methylenetetrahydrofolate reductase (NAD...	3	3	0.16	0.00014
19	GO:0042287	MHC protein binding	3	3	0.16	0.00014
20	GO:0042289	MHC class II protein binding	3	3	0.16	0.00014
21	GO:0016836	hydro-lyase activity	39	9	2.03	0.00014
22	GO:0022891	substrate-specific transmembrane transpo...	738	62	38.49	0.00015
23	GO:0030170	pyridoxal phosphate binding	87	14	4.54	0.00016
24	GO:0070011	peptidase activity, acting on L-amino ac...	653	56	34.05	0.00018
25	GO:0008509	anion transmembrane transporter activity	158	20	8.24	0.00022
26	GO:0022857	transmembrane transporter activity	779	64	40.63	0.00022
27	GO:0015075	ion transmembrane transporter activity	689	58	35.93	0.00023
28	GO:0016645	oxidoreductase activity, acting on the C...	26	7	1.36	0.00028
29	GO:0004175	endopeptidase activity	508	45	26.49	0.00038
30	GO:0016298	lipase activity	74	12	3.86	0.00042
31	GO:0016835	carbon-oxygen lyase activity	45	9	2.35	0.00045
32	GO:0003933	GTP cyclohydrolase activity	4	3	0.21	0.00054
33	GO:0003934	GTP cyclohydrolase I activity	4	3	0.21	0.00054
34	GO:0004356	glutamate-ammonia ligase activity	4	3	0.21	0.00054
35	GO:0016211	ammonia ligase activity	4	3	0.21	0.00054
36	GO:0016863	intramolecular oxidoreductase activity, ...	4	3	0.21	0.00054
37	GO:0016880	acid-ammonia (or amide) ligase activity	4	3	0.21	0.00054
38	GO:0016616	oxidoreductase activity, acting on the C...	66	11	3.44	0.00057
39	GO:0009055	electron carrier activity	199	22	10.38	0.00073
40	GO:0016853	isomerase activity	104	14	5.42	0.001
41	GO:0050660	flavin adenine dinucleotide binding	71	11	3.7	0.00106
42	GO:0031419	cobalamin binding	5	3	0.26	0.00131
43	GO:0016646	oxidoreductase activity, acting on the C...	17	5	0.89	0.0014
44	GO:0016787	hydrolase activity	2747	176	143.26	0.00188
45	GO:0005452	inorganic anion exchanger activity	27	6	1.41	0.00228
46	GO:0015301	anion:anion antiporter activity	27	6	1.41	0.00228
47	GO:0005319	lipid transporter activity	46	8	2.4	0.00237
48	GO:0016860	intramolecular oxidoreductase activity	19	5	0.99	0.00241
49	GO:0004047	aminomethyltransferase activity	6	3	0.31	0.00251
50	GO:0004465	lipoprotein lipase activity	6	3	0.31	0.00251
51	GO:0004163	diphosphomevalonate decarboxylase activi...	2	2	0.1	0.00272
52	GO:0004421	hydroxymethylglutaryl-CoA synthase activ...	2	2	0.1	0.00272
53	GO:0004496	mevalonate kinase activity	2	2	0.1	0.00272
54	GO:0004506	squalene monooxygenase activity	2	2	0.1	0.00272
55	GO:0004512	inositol-3-phosphate synthase activity	2	2	0.1	0.00272
56	GO:0016153	urocanate hydratase activity	2	2	0.1	0.00272
57	GO:0016872	intramolecular lyase activity	2	2	0.1	0.00272
58	GO:0030284	estrogen receptor activity	2	2	0.1	0.00272
59	GO:0003995	acyl-CoA dehydrogenase activity	20	5	1.04	0.00307
60	GO:0016705	oxidoreductase activity, acting on paire...	38	7	1.98	0.00314
61	GO:0015077	monovalent inorganic cation transmembran...	309	28	16.11	0.00329
62	GO:0004075	biotin carboxylase activity	13	4	0.68	0.0036
63	GO:0004089	carbonate dehydratase activity	13	4	0.68	0.0036
64	GO:0016885	ligase activity, forming carbon-carbon b...	13	4	0.68	0.0036
65	GO:0004620	phospholipase activity	60	9	3.13	0.00371
66	GO:0003854	3-beta-hydroxy-delta5-steroid dehydrogen...	7	3	0.37	0.00423
67	GO:0004470	malic enzyme activity	7	3	0.37	0.00423
68	GO:0004736	pyruvate carboxylase activity	7	3	0.37	0.00423
69	GO:0019238	cyclohydrolase activity	7	3	0.37	0.00423
70	GO:0033764	steroid dehydrogenase activity, acting o...	7	3	0.37	0.00423
71	GO:0008236	serine-type peptidase activity	187	19	9.75	0.00424
72	GO:0017171	serine hydrolase activity	187	19	9.75	0.00424
73	GO:0005342	organic acid transmembrane transporter a...	51	8	2.66	0.00461
74	GO:0004359	glutaminase activity	14	4	0.73	0.00483
75	GO:0016627	oxidoreductase activity, acting on the C...	42	7	2.19	0.0056
76	GO:0016758	transferase activity, transferring hexos...	79	10	4.12	0.00783
77	GO:0004375	glycine dehydrogenase (decarboxylating) ...	3	2	0.16	0.00787
78	GO:0004392	heme oxygenase (decyclizing) activity	3	2	0.16	0.00787
79	GO:0008449	N-acetylglucosamine-6-sulfatase activity	3	2	0.16	0.00787
80	GO:0016642	oxidoreductase activity, acting on the C...	3	2	0.16	0.00787
81	GO:0047750	cholestenol delta-isomerase activity	3	2	0.16	0.00787
82	GO:0004601	peroxidase activity	25	5	1.3	0.00848
83	GO:0016684	oxidoreductase activity, acting on perox...	25	5	1.3	0.00848
84	GO:0022890	inorganic cation transmembrane transport...	408	33	21.28	0.00857
85	GO:0046983	protein dimerization activity	132	14	6.88	0.00904
86	GO:0004806	triglyceride lipase activity	9	3	0.47	0.00937
87	GO:0004982	N-formyl peptide receptor activity	9	3	0.47	0.00937
88	GO:0016229	steroid dehydrogenase activity	9	3	0.47	0.00937
>Cellular Component
	GO.ID	GO annotation	Term Annotated	Significant	Expected	Classic Fisher p value
1	GO:0005833	hemoglobin complex	17	13	0.82	1.2e-14
2	GO:0044445	cytosolic part	64	19	3.08	7.4e-11
3	GO:0005829	cytosol	66	19	3.17	1.3e-10
4	GO:0016020	membrane	3806	228	183.06	8.5e-06
5	GO:0031224	intrinsic component of membrane	1805	113	86.82	0.0011
6	GO:0016021	integral component of membrane	1773	111	85.28	0.0013
7	GO:0044425	membrane part	2065	124	99.32	0.003
8	GO:0005787	signal peptidase complex	7	3	0.34	0.0033
9	GO:0005739	mitochondrion	139	14	6.69	0.0069
10	GO:0005764	lysosome	17	4	0.82	0.0076
11	GO:0000323	lytic vacuole	18	4	0.87	0.0094
