# Supplementary material for: Transcriptome Analyses Reveal Lipid Metabolic Process in Liver Related to the Difference of Carcass Fat Content in Rainbow Trout (Oncorhynchus mykiss)
Source: Int J Genomics. 2016 Aug 29;2016:7281585. doi: 10.1155/2016/7281585 (PMC5019904; doi:10.1155/2016/7281585)
Supplement: Supplementary file 1 — The detailed information about the 1,694 differentially expressed transcripts identified from liver tissue between the high and low carcass fat content fish were shown in the Supplementary Materials, including standard nomenclature, expression and gene annotation provided by the Trout Genome dataset and the GO enrichment results by using the topGO package. [file 7281585.f1.zip › Figures_and_Supplementary Tables/Supplementary Tables/TableS3.xlsx]

## Sheet: Sheet1
Standard nomenclature	Expression In High Carcass Fat Content Group	Expression In Low Carcass Fat Content Group	Adjuested p vaule	Fold(High/Low)	Gene annotation
GSONMT00055795001	0.905148	0	0.00210953		Uncharacterized_protein
GSONMT00073598001	4.17241	0	0.00210953		Chromosome_4_SCAF14624,_whole_genome_shotgun
GSONMT00073599001	3.6289	0	0.00210953		Uncharacterized
GSONMT00049946001	49.4856	10.1388	0.00210953	4.88081	Uncharacterized
GSONMT00054194001	21.1655	5.15625	0.00380702	4.10482	Lipoprotein
GSONMT00047365001	22.7557	5.60479	0.00210953	4.06005	Endothelial
GSONMT00034460001	2.08323	0.541324	0.017454	3.8484	Uncharacterized_protein
GSONMT00047589001	13.7069	4.28641	0.00210953	3.19776	Proactivator
GSONMT00039491001	12.7448	4.11441	0.00210953	3.0976	Uncharacterized_protein
GSONMT00075670001	2.79808	0.937839	0.00380702	2.98354	Lipoprotein
GSONMT00059711001	14.1024	4.81223	0.00210953	2.93053	Uncharacterized_protein
GSONMT00074060001	24.2249	8.48807	0.034061	2.85399	N-acylneuraminate
GSONMT00066333001	190.247	69.8885	0.0466085	2.72215	Uncharacterized_protein
GSONMT00065207001	3.11291	1.19002	0.00380702	2.61585	'1-phosphatidylinositol-4,5-bisphosphate_phosphodiesterase
GSONMT00042226001	7.67946	2.93904	0.0492766	2.61291	Uncharacterized_protein
GSONMT00063783001	29.7614	11.516	0.00919502	2.58435	3_beta-hydroxysteroid_dehydrogenase_type
GSONMT00015202001	6.02104	2.37265	0.0275077	2.53769	Phosphatidylinositol_4-kinase
GSONMT00046771001	12.9402	6.08799	0.043876	2.12553	Uncharacterized_protein
GSONMT00044710001	6.6633	13.7472	0.043876	0.484702	Phosphatidylinositol_glycan,_class
GSONMT00024336001	35.3978	80.1965	0.0227047	0.441388	Group_XIIA_secretory_phospholipase
GSONMT00052706001	18.3785	50.7686	0.00210953	0.362005	Uncharacterized_protein
GSONMT00039078001	20.2826	56.6354	0.00210953	0.358126	Sterol-4-alpha-carboxylate_3-dehydrogenase,
GSONMT00053621001	1.62407	4.5552	0.0412822	0.356531	Patatin-like_phospholipase_domain-containing_protein
GSONMT00012432001	17.2382	49.5575	0.044947	0.347842	cDNA:_FLJ21107_fis,_clone
GSONMT00026582001	1.39576	4.35878	0.00210953	0.320218	Uncharacterized
GSONMT00079312001	0.982337	3.24988	0.0104049	0.302269	Uncharacterized
GSONMT00021035001	91.3318	315.787	0.00210953	0.28922	UPI000194C71C_related
GSONMT00050272001	11.1177	38.6445	0.00210953	0.287692	Uncharacterized
GSONMT00059675001	14.1387	49.4573	0.00210953	0.285877	Uncharacterized
GSONMT00021145001	52.7127	201.486	0.00210953	0.26162	PREDICTED:_LOW_QUALITY_PROTEIN:_fatty_acid_desaturase_2
GSONMT00053490001	73.2694	280.473	0.00210953	0.261235	Uncharacterized
GSONMT00037649001	0.419152	1.62621	0.00210953	0.257748	Chromosome_undetermined_SCAF7270,_whole_genome_shotgun_sequence._(Fragment)
GSONMT00008404001	128.445	551.634	0.00210953	0.232845	PREDICTED:_LOW_QUALITY_PROTEIN:_fatty_acid_desaturase_2
GSONMT00030631001	1.92816	8.81449	0.00210953	0.218749	Uncharacterized
GSONMT00002199001	0.609066	3.11482	0.00210953	0.195538	Uncharacterized_protein_(Fragment)
GSONMT00008378001	3.52554	19.6114	0.00210953	0.17977	Chromosome_8_SCAF15044,_whole_genome_shotgun_sequence._(Fragment)
GSONMT00002539001	3.41317	23.0813	0.00210953	0.147876	Diphosphomevalonate
GSONMT00075232001	1.46647	12.9286	0.00210953	0.113428	Uncharacterized
GSONMT00016199001	3.43223	30.9264	0.00210953	0.110981	Choline/ethanolaminephosphotransferase
GSONMT00064410001	14.0901	153.807	0.00210953	0.091609	Isopentenyl-diphosphate_Delta-isomerase
GSONMT00037871001	24.3223	265.749	0.00210953	0.0915236
GSONMT00010144001	12.4614	147.393	0.00210953	0.0845454
GSONMT00052214001	9.28002	118.118	0.00210953	0.0785657	Chromosome_8_SCAF15044,_whole_genome_shotgun_sequence._(Fragment)
GSONMT00080720001	10.2606	130.606	0.00210953	0.0785615	Uncharacterized_protein
GSONMT00003231001	108.524	1720.31	0.00532933	0.063084	Uncharacterized
GSONMT00010243001	9.23386	159.285	0.00210953	0.0579707	Hydroxymethylglutaryl-CoA_synthase,
GSONMT00016297001	7.27016	142.491	0.00210953	0.0510219	Hydroxymethylglutaryl-CoA_synthase,
GSONMT00065670001	1.57809	35.6066	0.00210953	0.0443202	Squalene
GSONMT00054590001	0.128952	7.91748	0.015681	0.016287	Diphosphomevalonate
GSONMT00061388001	0	4.14031	0.00210953	0	Uncharacterized
GSONMT00063526001	0	70.4989	0.00210953	0	Uncharacterized
GSONMT00070411001	0	9.14907	0.0472534	0	Uncharacterized
